# Supplementary material
Source: MDPI journal article supplement (https://www.mdpi.com/2071-1050/15/13/9969)
Supplement: s1 [file s1]

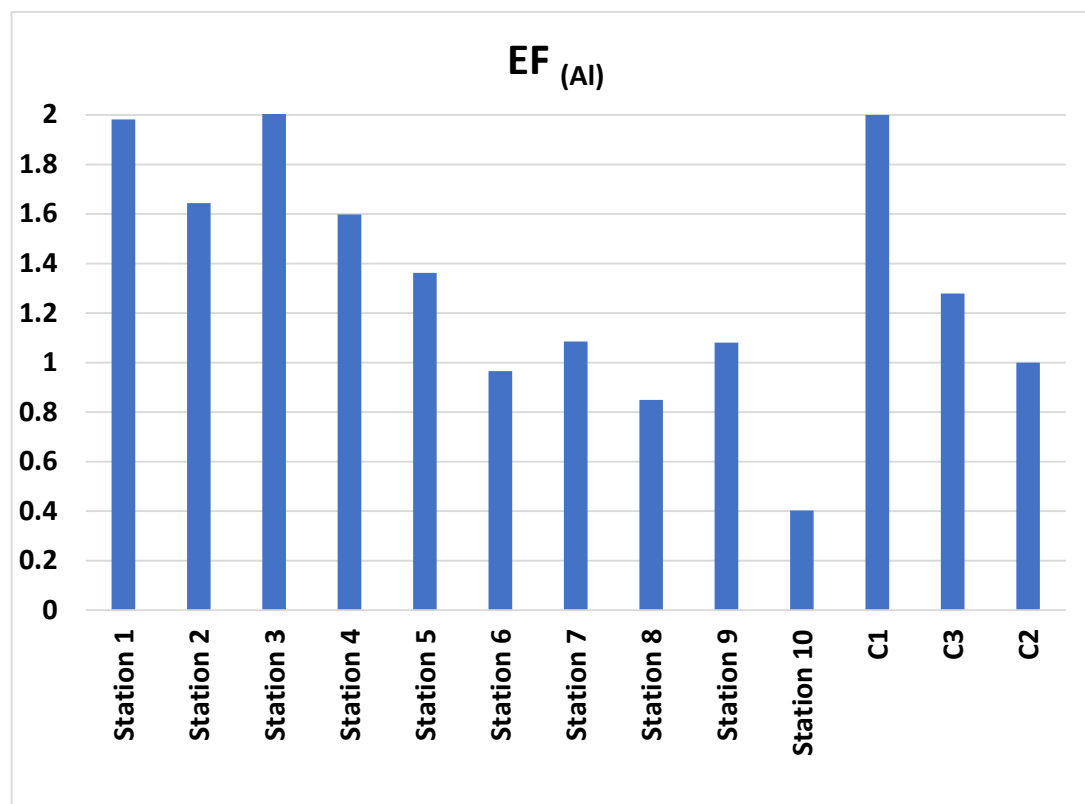

Supplementary figure S1. EF for AI.

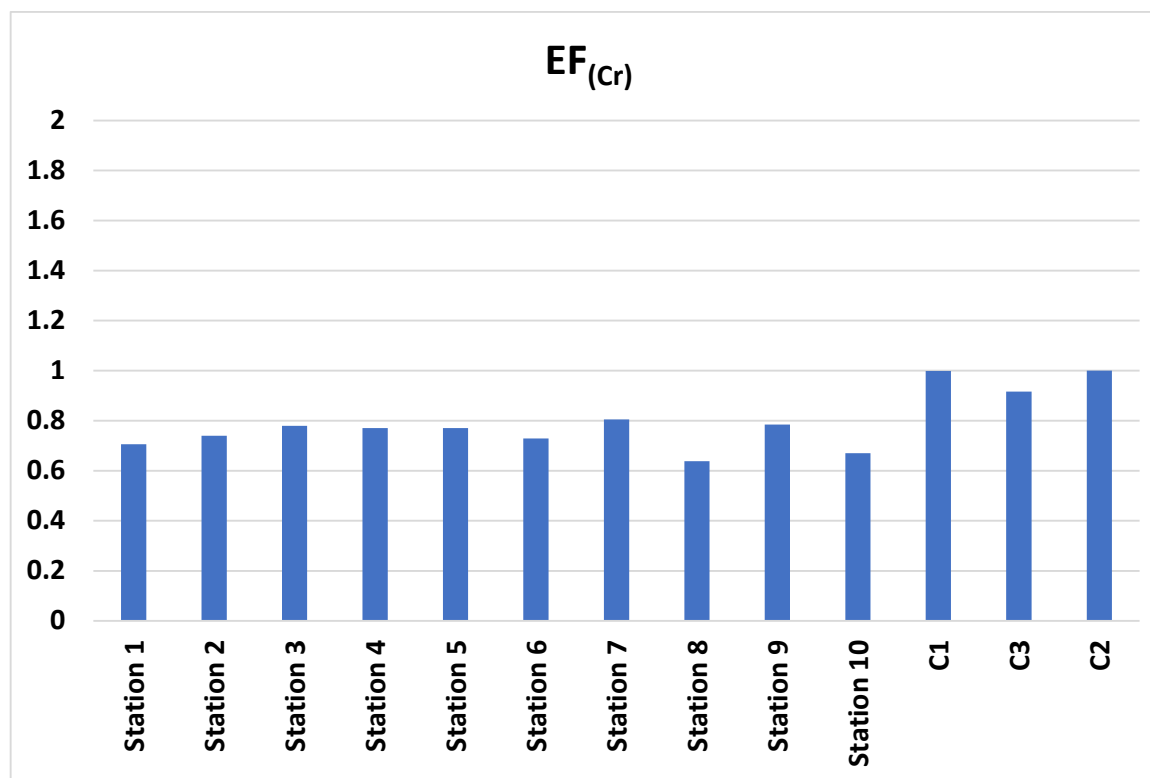

Supplementary figure S2. EF for Cr.

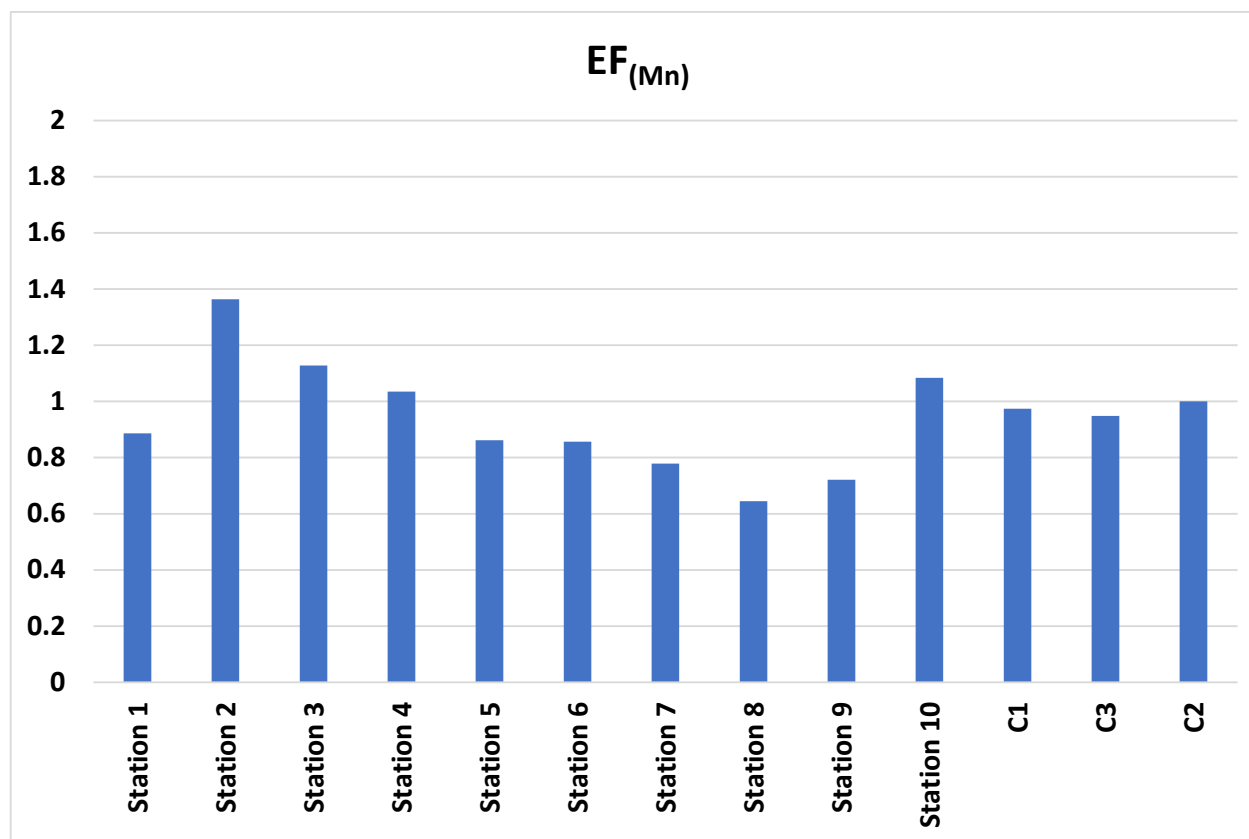

Supplementary figure S3. EF for Mn.

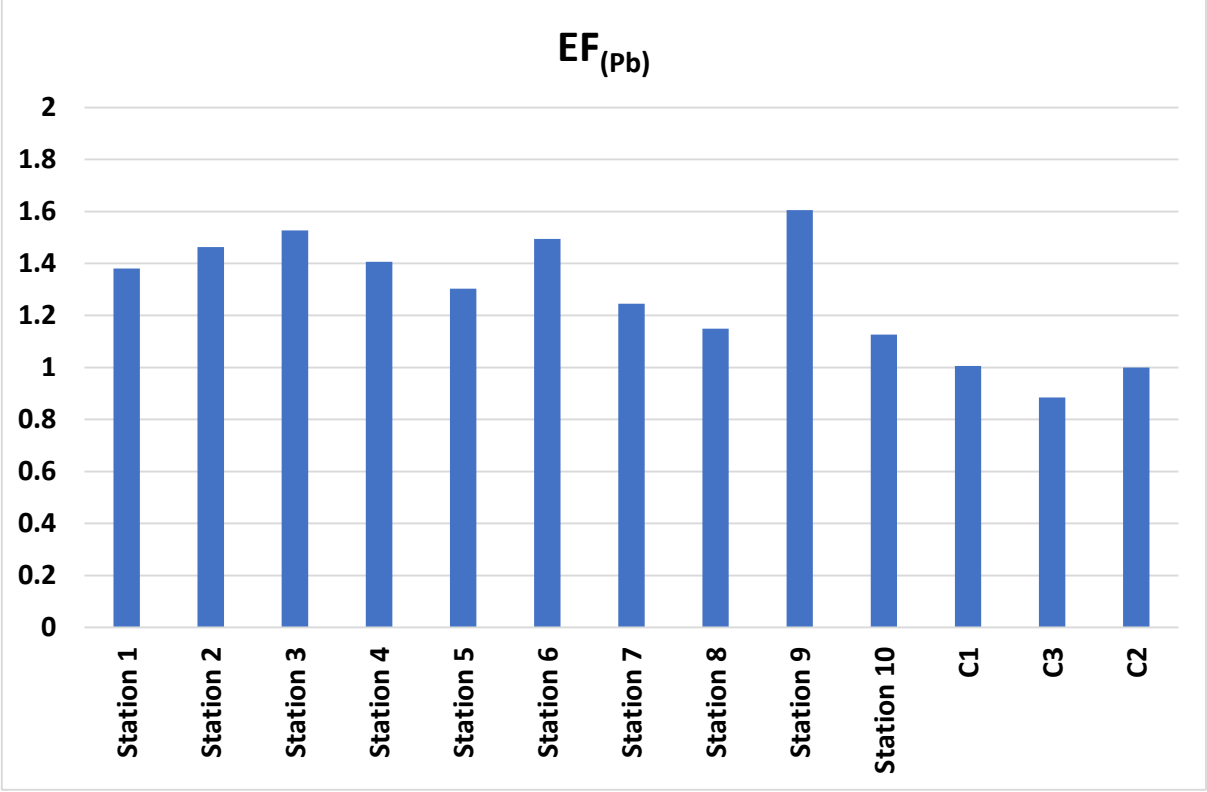

Supplementary figure S4. EF for Pb.

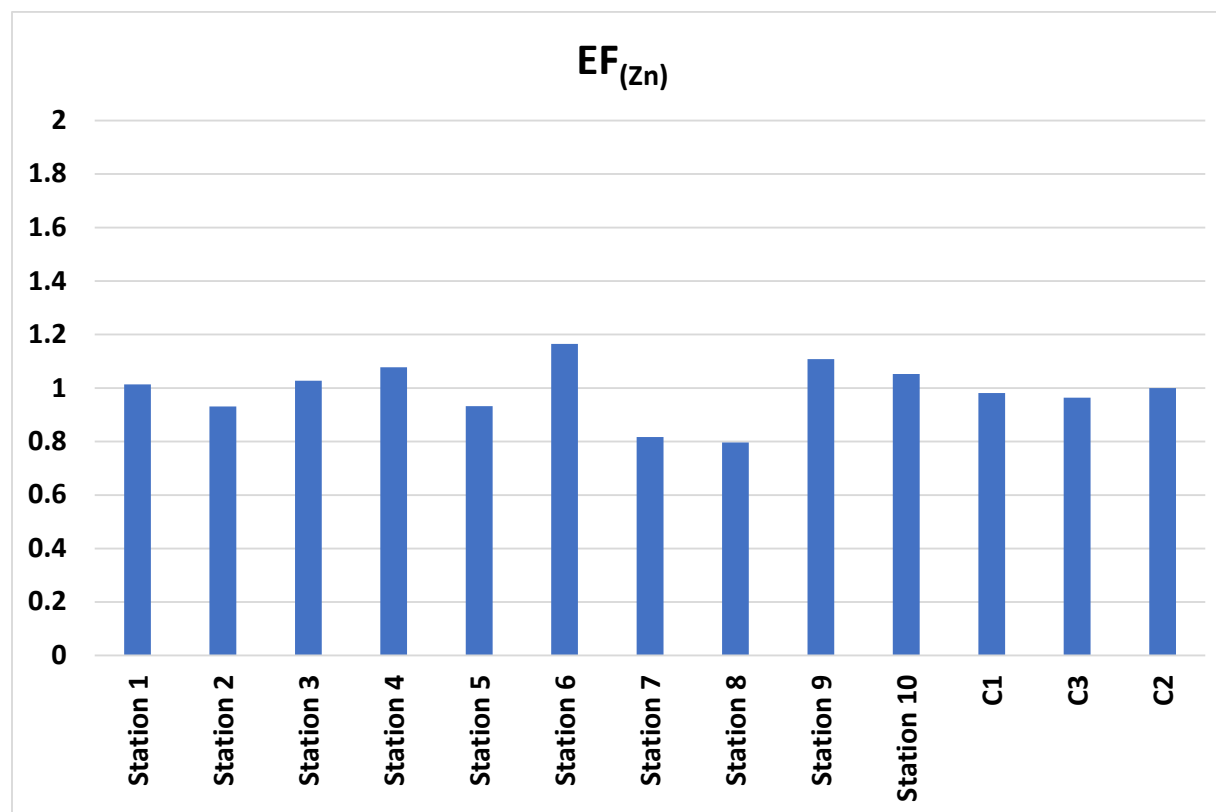

Supplementary figure S5. EF for Zn.

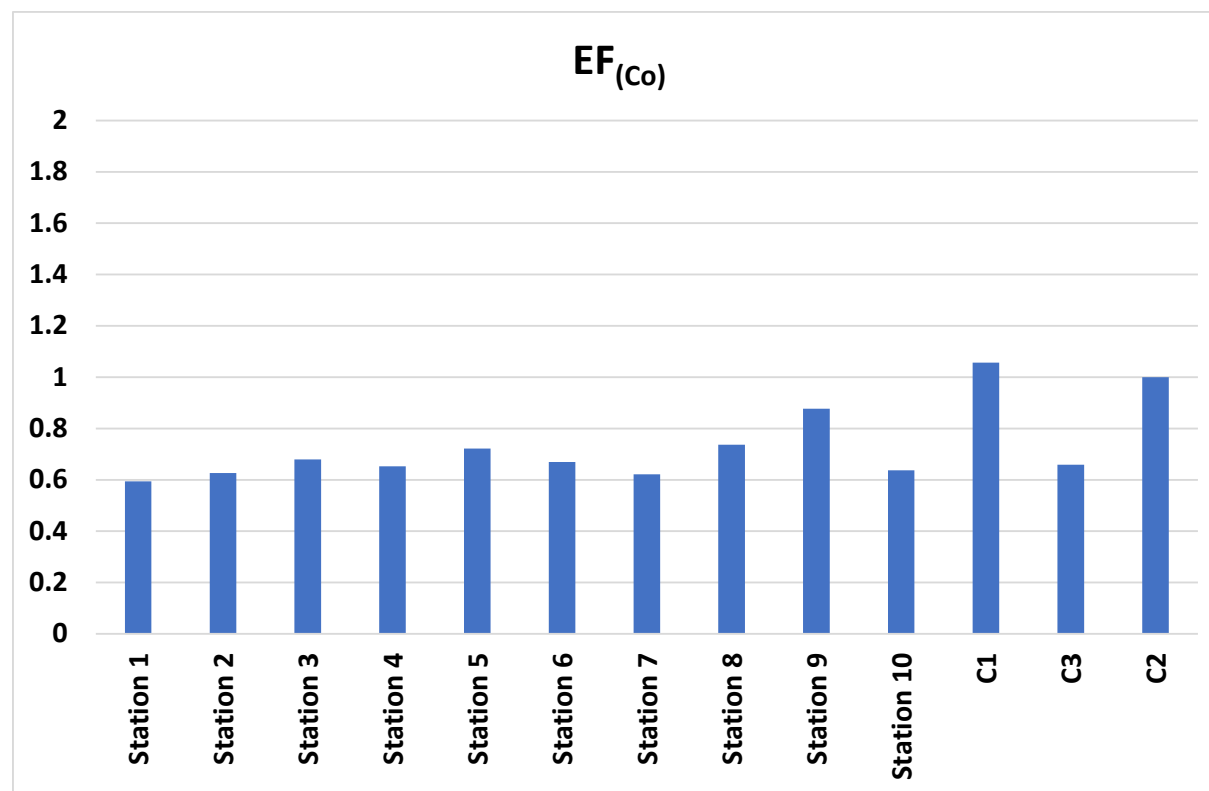

Supplementary figure S6. EF for Co.

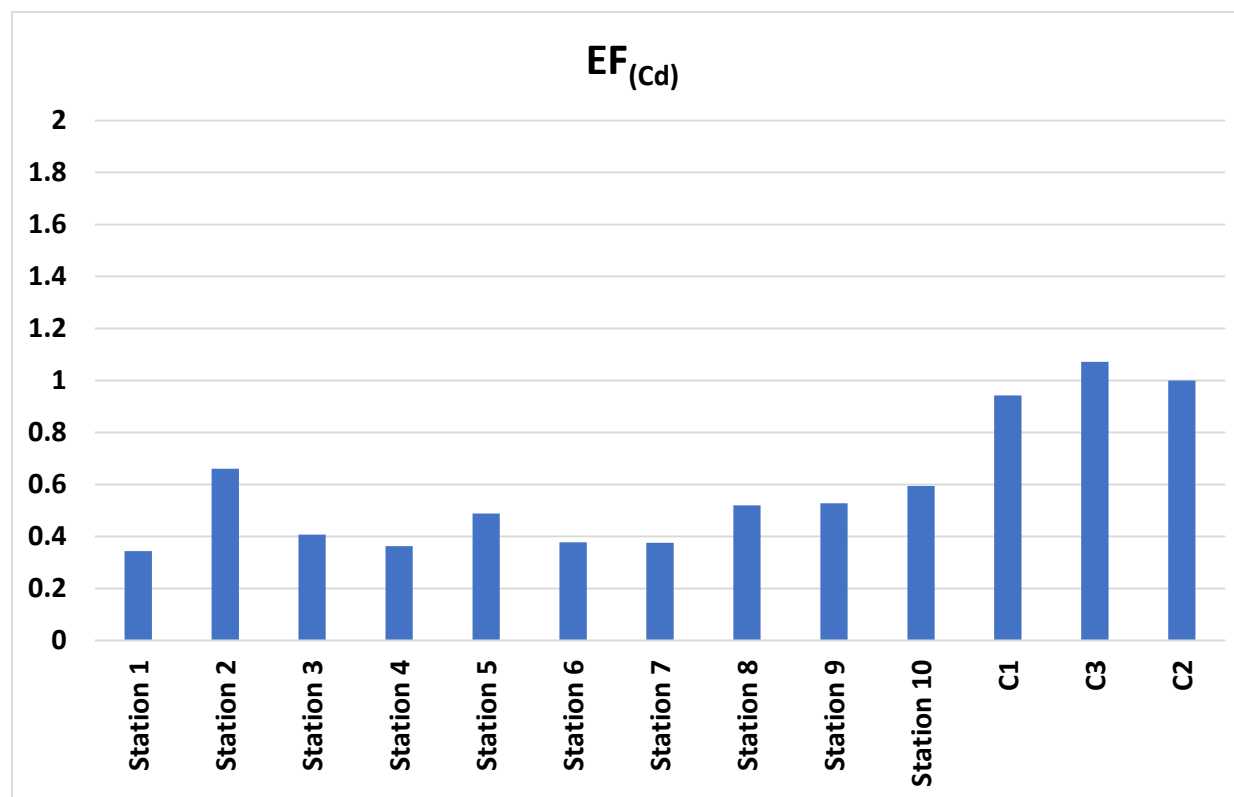

Supplementary figure S7. EF for Cd.

**Supplementary table S1. Aluminum values obtained from sediment samples taken from 10 stations in Bafa Lake during 4 seasons. (mg kg<sup>-1</sup> dry weight).**

|                       | Station 1      | Station 2 | Station 3 | Station 4 | Station 5 | Station 6 | Station 7 | Station 8 | Station 9 | Station 10   | Average<br>(Monthly) |
|-----------------------|----------------|-----------|-----------|-----------|-----------|-----------|-----------|-----------|-----------|--------------|----------------------|
| <b>SPRING</b>         | 5396.91        | 3452.64   | 3526.14   | 4322.83   | 5797.46   | 3652.45   | 2540.90   | 2985.21   | 3919.11   | 1373.52      | 3696.72              |
| <b>SUMMER</b>         | <b>7251.38</b> | 6089.21   | 7177.19   | 6411.06   | 4696.83   | 3897.31   | 3811.02   | 3096.29   | 4122.06   | <b>54.03</b> | 4660.64              |
| <b>FALL</b>           | 6149.08        | 4732.94   | 4729.78   | 3165.31   | 2459.97   | 1449.56   | 3950.40   | 4180.76   | 3066.66   | 3309.59      | 3719.40              |
| <b>WINTER</b>         | 3687.33        | 3939.21   | 4734.15   | 3511.71   | 2891.81   | 2060.73   | 3282.17   | 1387.48   | 1258.27   | 562.73       | 2731.56              |
| <b>Average (Sta.)</b> | 5621.17        | 4553.50   | 5041.82   | 4352.73   | 3961.52   | 2765.01   | 3396.12   | 2912.44   | 3091.53   | 1324.97      |                      |



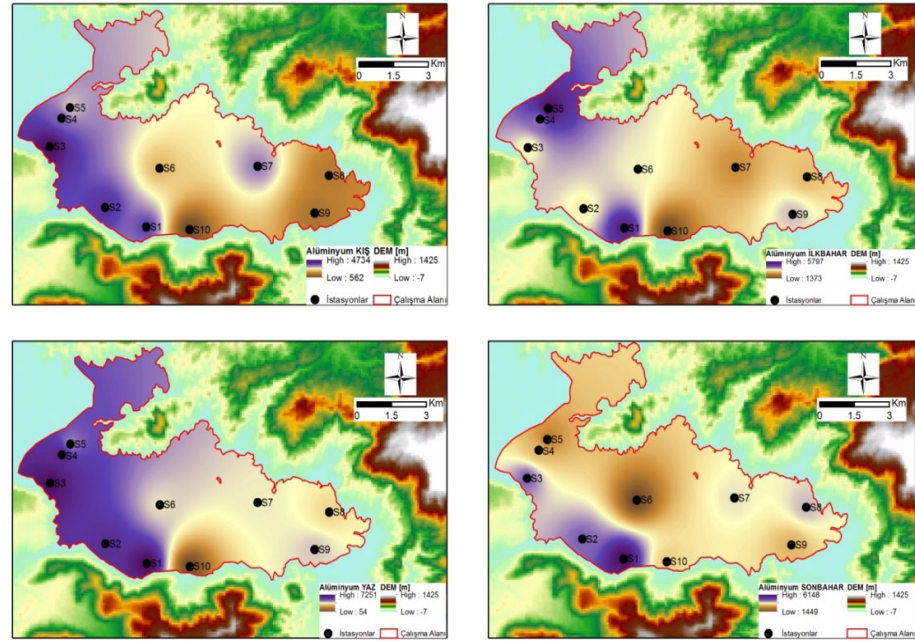

Supplementary figure S8. Map of Al values detected seasonally in sediment samples from 10 stations in Lake Bafa.

Supplementary table S2. Aluminum values obtained from sediment core samples taken from 3 stations in Lake Bafa ( $\text{mg kg}^{-1}$  dry weight).

|                | 0-5 cm   |           |          | 5-10 cm  |           |          |
|----------------|----------|-----------|----------|----------|-----------|----------|
|                | <0.063   | 0.3-0.063 | 0.3<     | <0.063   | 0.3-0.063 | 0.3<     |
| C <sub>1</sub> | 1427.135 | 3437.213  | 2388.352 | 4650.623 | 1122.839  | 1479.238 |
| C <sub>2</sub> | 1250.95  | 460.106   | 759.0041 | 1155.902 | 817.7798  | 1505.069 |
| C <sub>3</sub> | 2895.472 | 687.0103  | 110.5496 | 1881.308 | 752.523   | 2132.149 |

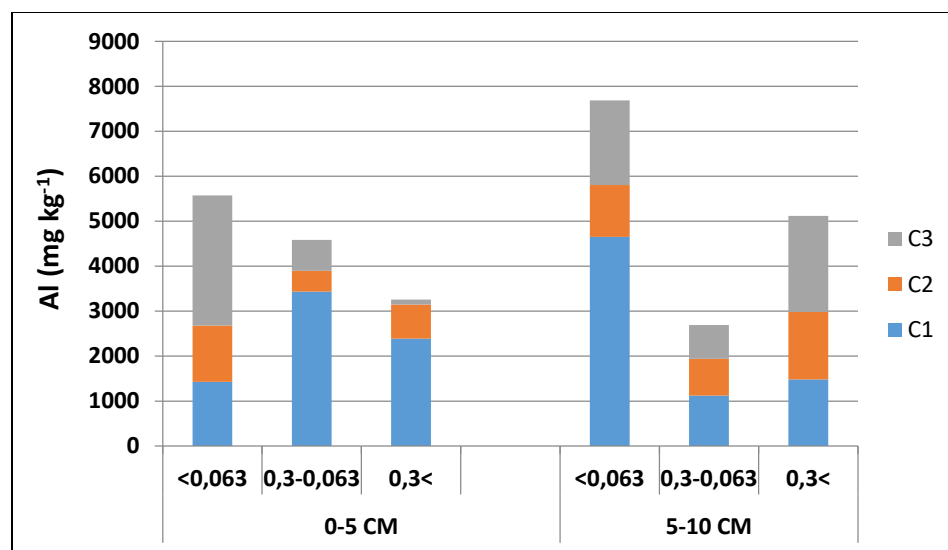

Supplementary figure S9. Cumulative Al concentrations at different depths in core samples taken from 3 stations in Lake Bafa ( $\text{mg kg}^{-1}$  dry weight).

**Supplementary table S3. Manganese values obtained from sediment samples taken from 10 stations in Bafa Lake during 4 seasons (mg kg<sup>-1</sup> dry weight).**

|                       | Station 1 | Station 2      | Station 3 | Station 4 | Station 5 | Station 6 | Station 7 | Station 8     | Station 9 | Station 10 | Average<br>(Monthly) |
|-----------------------|-----------|----------------|-----------|-----------|-----------|-----------|-----------|---------------|-----------|------------|----------------------|
| <b>SPRING</b>         | 536.45    | 626.95         | 682.17    | 757.26    | 779.37    | 503.30    | 688.26    | 772.31        | 660.22    | 1112.42    | 711.87               |
| <b>SUMMER</b>         | 673.44    | 658.78         | 916.28    | 903.56    | 510.89    | 597.24    | 672.27    | 607.26        | 395.65    | 695.26     | 663.06               |
| <b>FALL</b>           | 561.70    | <b>1331.47</b> | 778.60    | 667.52    | 664.73    | 634.43    | 694.80    | 681.84        | 717.59    | 705.53     | 743.82               |
| <b>WINTER</b>         | 819.11    | 1275.39        | 833.91    | 575.13    | 626.82    | 792.10    | 455.12    | <b>197.05</b> | 352.17    | 1165.27    | 709.21               |
| <b>Average (Sta.)</b> | 647.68    | 973.15         | 802.74    | 725.87    | 645.45    | 631.77    | 627.61    | 564.62        | 531.41    | 919.62     |                      |

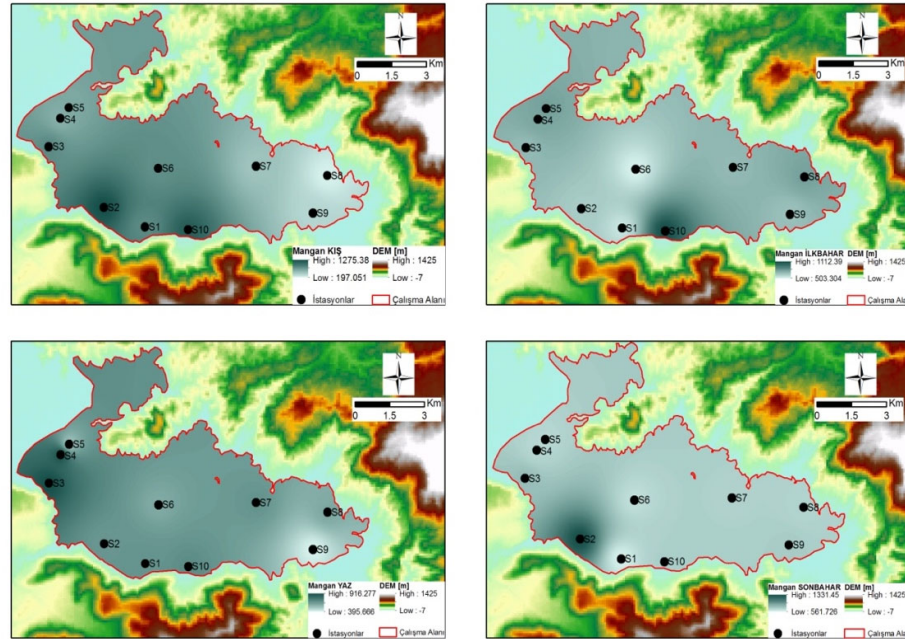

Supplementary figure S10. Map of seasonally determined Mn values in sediment samples from 10 stations in Lake Bafa.

Supplementary table S4. Manganese values obtained from sediment core samples taken from 3 stations in Lake Bafa ( $\text{mg kg}^{-1}$  dry weight).

|                | 0-5 cm |           |        | 5-10 cm |           |        |
|----------------|--------|-----------|--------|---------|-----------|--------|
|                | <0.063 | 0.3-0.063 | 0.3<   | <0.063  | 0.3-0.063 | 0.3<   |
| C <sub>1</sub> | 216.27 | 266.43    | 204.85 | 439.93  | 117.70    | 137.34 |
| C <sub>2</sub> | 326.20 | 151.63    | 232.49 | 207.66  | 160.64    | 331.11 |
| C <sub>3</sub> | 512.54 | 151.04    | 136.75 | 228.70  | 134.91    | 348.41 |

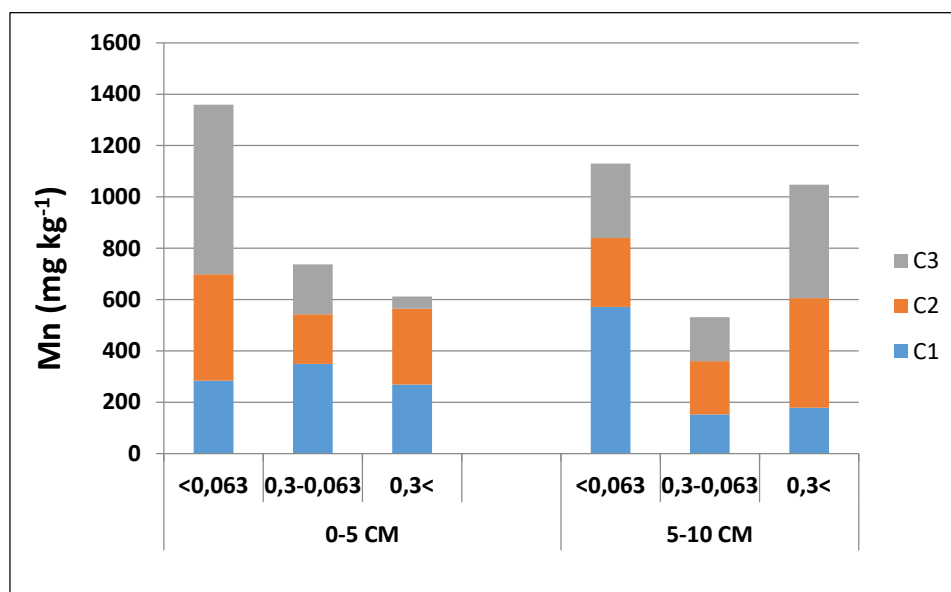

Supplementary figure S11. Cumulative Mn concentrations at different depths in core samples taken from 3 stations in Lake Bafa ( $\text{mg kg}^{-1}$  dry weight).

**Supplementary table S5. Iron values obtained from sediment samples taken from 10 stations in Bafa Lake during 4 seasons. (mg kg<sup>-1</sup> dry weight).**

|                       | Station 1 | Station 2 | Station 3 | Station 4 | Station 5 | Station 6 | Station 7 | Station 8       | Station 9       | Station 10 | Average<br>(Monthly) |
|-----------------------|-----------|-----------|-----------|-----------|-----------|-----------|-----------|-----------------|-----------------|------------|----------------------|
| <b>SPRING</b>         | 29118.07  | 30566.32  | 36515.00  | 27892.03  | 32028.99  | 32847.46  | 34601.36  | <b>41345.00</b> | <b>22308.95</b> | 38617.39   | 32584.06             |
| <b>SUMMER</b>         | 32664.07  | 30534.57  | 30342.95  | 33200.67  | 24092.52  | 30286.30  | 32107.89  | 36931.25        | 29339.54        | 39551.37   | 31905.11             |
| <b>FALL</b>           | 31428.16  | 26037.76  | 26830.40  | 28180.39  | 34677.49  | 28701.48  | 31190.30  | 32934.29        | 36097.41        | 34521.91   | 31059.96             |
| <b>WINTER</b>         | 31717.71  | 34862.91  | 28052.11  | 30665.91  | 37293.24  | 34327.91  | 39928.57  | 38582.02        | 38212.60        | 32366.88   | 34600.99             |
| <b>Average (Sta.)</b> | 31232.00  | 30500.39  | 30435.12  | 29984.75  | 32023.06  | 31540.79  | 34457.03  | 37448.14        | 31489.62        | 36264.39   |                      |

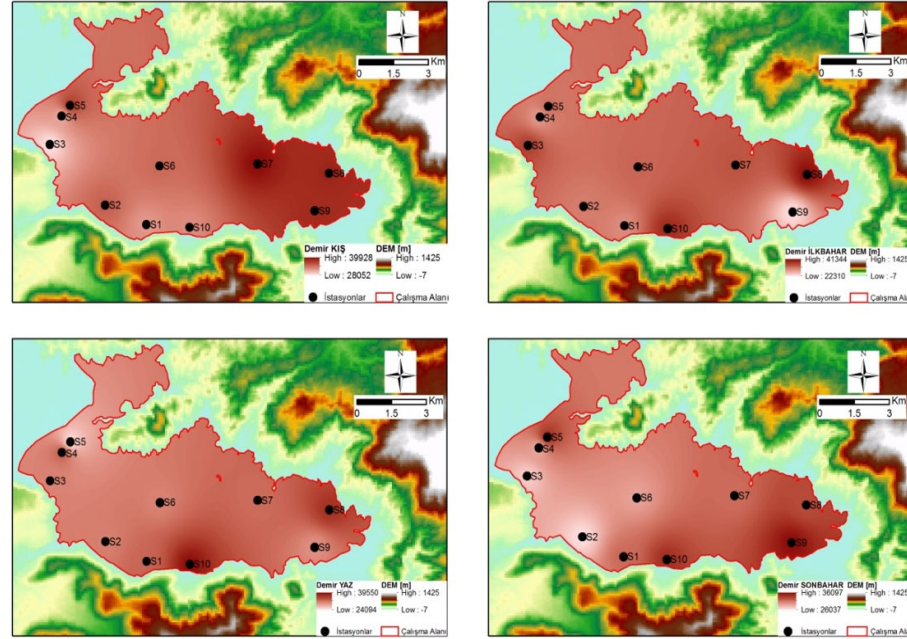

Supplementary figure S12. Map of seasonally determined Fe values in sediment samples from 10 stations in Lake Bafa.

Supplementary table S6. Iron values obtained from sediment core samples taken from 3 stations in Lake Bafa (mg kg<sup>-1</sup> dry weight).

|                | 0-5 cm  |           |         | 5-10 cm  |           |         |
|----------------|---------|-----------|---------|----------|-----------|---------|
|                | <0.063  | 0.3-0.063 | 0.3<    | <0.063   | 0.3-0.063 | 0.3<    |
| C <sub>1</sub> | 8215.11 | 13290.86  | 8909.05 | 25585.27 | 5140.31   | 7337.75 |
| C <sub>2</sub> | 6846.73 | 23149.72  | 5226.38 | 15714.73 | 4379.64   | 9297.94 |
| C <sub>3</sub> | 7154.27 | 19425.41  | 5160.28 | 13490.24 | 8568.81   | 9669.71 |

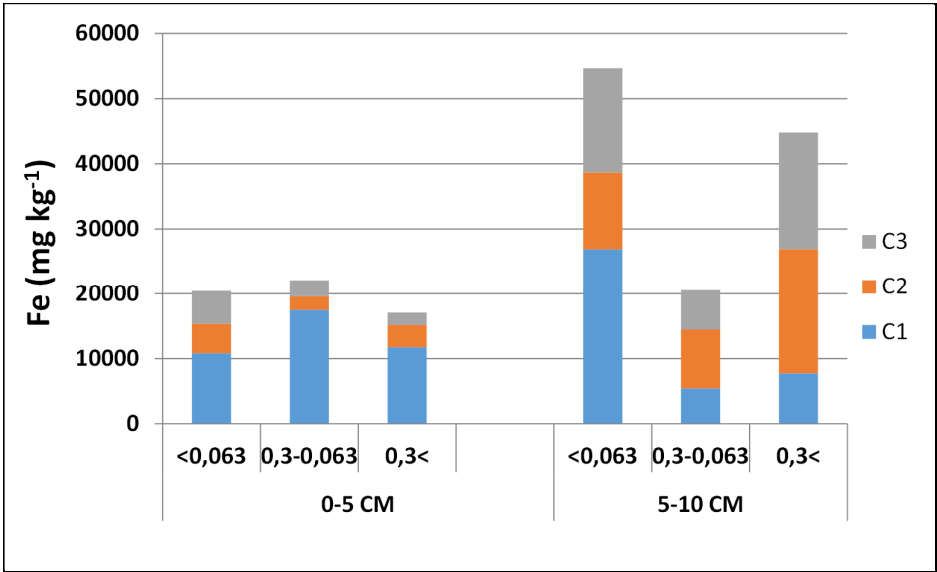

Supplementary figure S13. Cumulative Fe concentrations at different depths in core samples taken from 3 stations in Lake Bafa (mg kg<sup>-1</sup> dry weight).



Supplementary table S7. Chromium values obtained from sediment samples taken from 10 stations in Bafa Lake during 4 seasons. (mg kg<sup>-1</sup> dry weight).

|                       | Station 1 | Station 2 | Station 3 | Station 4 | Station 5 | Station 6 | Station 7     | Station 8 | Station 9 | Station 10 | Average<br>(Monthly) |
|-----------------------|-----------|-----------|-----------|-----------|-----------|-----------|---------------|-----------|-----------|------------|----------------------|
| <b>SPRING</b>         | 217.02    | 251.33    | 214.36    | 252.38    | 230.35    | 155.76    | <b>330.82</b> | 239.56    | 242.74    | 252.81     | 238.71               |
| <b>SUMMER</b>         | 241.75    | 222.49    | 220.95    | 284.50    | 218.07    | 211.87    | 264.53        | 244.27    | 240.54    | <b>LOD</b> | 238.77               |
| <b>FALL</b>           | 226.81    | 202.44    | 224.21    | 166.30    | 247.20    | 242.66    | 232.24        | 199.73    | 229.21    | 223.68     | 219.45               |
| <b>WINTER</b>         | 153.60    | 182.28    | 243.11    | 176.43    | 243.19    | 265.08    | 227.91        | 225.99    | 227.87    | 217.25     | 216.27               |
| <b>Average (Sta.)</b> | 209.79    | 214.63    | 225.6577  | 219.90    | 234.70    | 218.84    | 263.87        | 227.39    | 235.09    | 231.25     |                      |

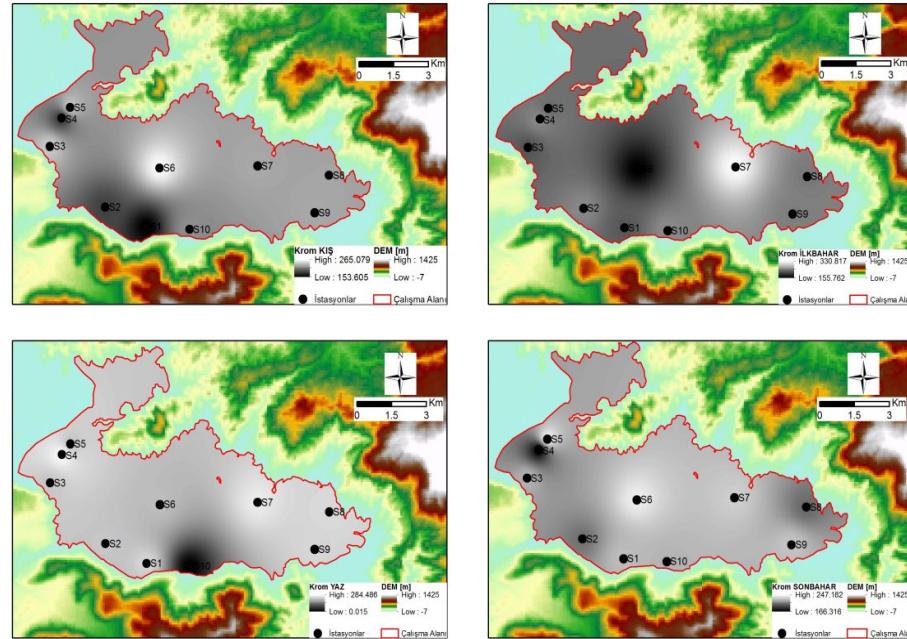

Supplementary figure S14. Map of seasonally determined Cr values in sediment samples from 10 stations in Lake Bafa.

Supplementary table S8. Chromium values obtained from sediment core samples taken from 3 stations in Lake Bafa ( $\text{mg kg}^{-1}$  dry weight).

|                | 0-5 cm |           |       | 5-10 cm |           |       |
|----------------|--------|-----------|-------|---------|-----------|-------|
|                | <0.063 | 0.3-0.063 | 0.3<  | <0.063  | 0.3-0.063 | 0.3<  |
| C <sub>1</sub> | 197.56 | 61.71     | 92.83 | 211.60  | 150.38    | 17.45 |
| C <sub>2</sub> | 132.98 | 68.14     | 91.06 | 225.10  | 110.96    | 28.28 |
| C <sub>3</sub> | 113.66 | 105.29    | 90.32 | 228.47  | 102.47    | 26.66 |

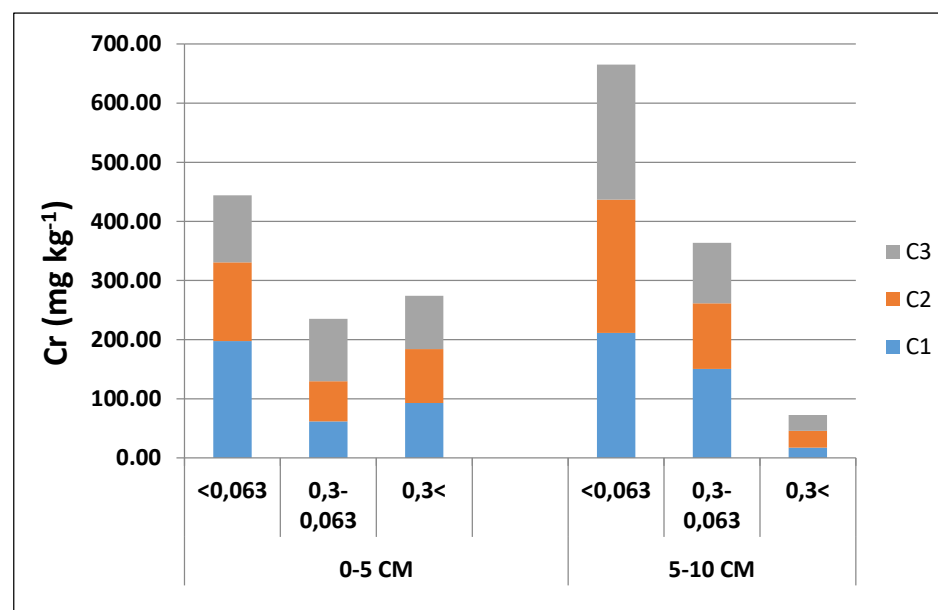

Supplementary figure S15. Cumulative Cr concentrations at different depths in core samples taken from 3 stations in Lake Bafa (mg kg<sup>-1</sup> dry weight).

Supplementary table S9. Cobalt values obtained from sediment samples taken from 10 stations in Lake Bafa during 4 seasons. (mg kg<sup>-1</sup> dry weight).

|                | Station 1  | Station 2   | Station 3 | Station 4 | Station 5 | Station 6  | Station 7   | Station 8 | Station 9 | Station 10 | Average<br>(Monthly) |
|----------------|------------|-------------|-----------|-----------|-----------|------------|-------------|-----------|-----------|------------|----------------------|
| SPRING         | 0.22       | 0.62        | 0.43      | 0.17      | 0.36      | 0.22       | 0.62        | 0.43      | 0.17      | 0.36       | 0.22                 |
| SUMMER         | 0.17       | <b>0.73</b> | 0.46      | 0.13      | 0.37      | 0.17       | <b>0.73</b> | 0.46      | 0.13      | 0.37       | 0.17                 |
| FALL           | <b>LOD</b> | 0.61        | 0.46      | 0.14      | 0.40      | <b>LOD</b> | 0.61        | 0.46      | 0.14      | 0.40       | 0.44                 |
| WINTER         | 0.24       | 0.65        | 0.45      | 0.18      | 0.38      | 0.24       | 0.65        | 0.45      | 0.18      | 0.38       | 0.24                 |
| Average (Sta.) | 0.19       | 0.62        | 0.44      | 0.42      | 0.19      | 0.62       | 0.44        | 0.42      | 0.19      | 0.62       |                      |

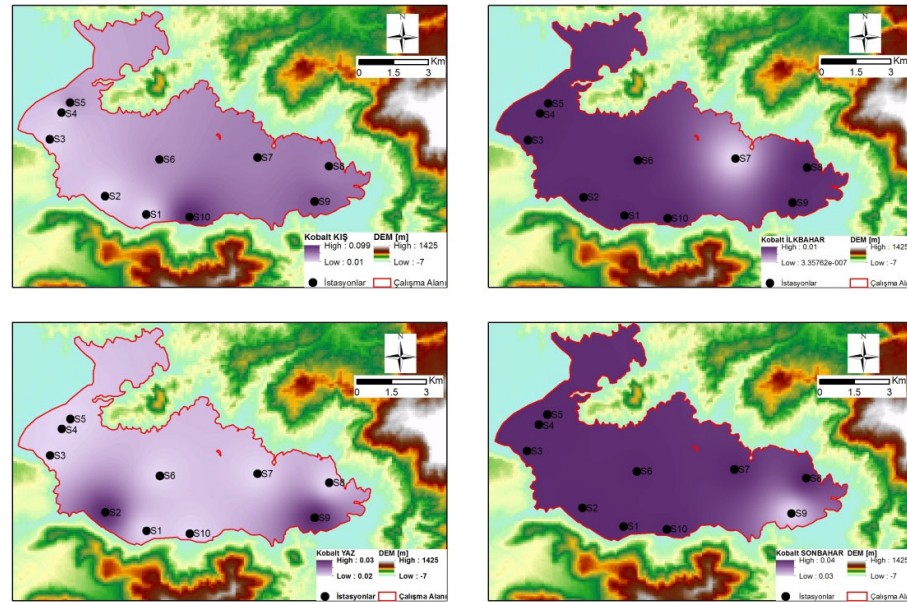

Supplementary figure S16. Map of seasonally determined cobalt values in sediment samples from 10 stations in Lake Bafa.

Supplementary table S10. Cobalt values obtained from sediment core samples taken from 3 stations in Lake Bafa ( $\text{mg kg}^{-1}$  dry weight).

|                | 0-5 cm |           |      | 5-10 cm |           |      |
|----------------|--------|-----------|------|---------|-----------|------|
|                | <0.063 | 0.3-0.063 | 0.3< | <0.063  | 0.3-0.063 | 0.3< |
| C <sub>1</sub> | 0.18   | 0.30      | 0.20 | 0.53    | 0.11      | 0.18 |
| C <sub>2</sub> | 0.39   | 0.12      | 0.13 | 0.34    | 0.24      | 0.16 |
| C <sub>3</sub> | 0.33   | 0.04      | 0.02 | 0.32    | 0.07      | 0.14 |

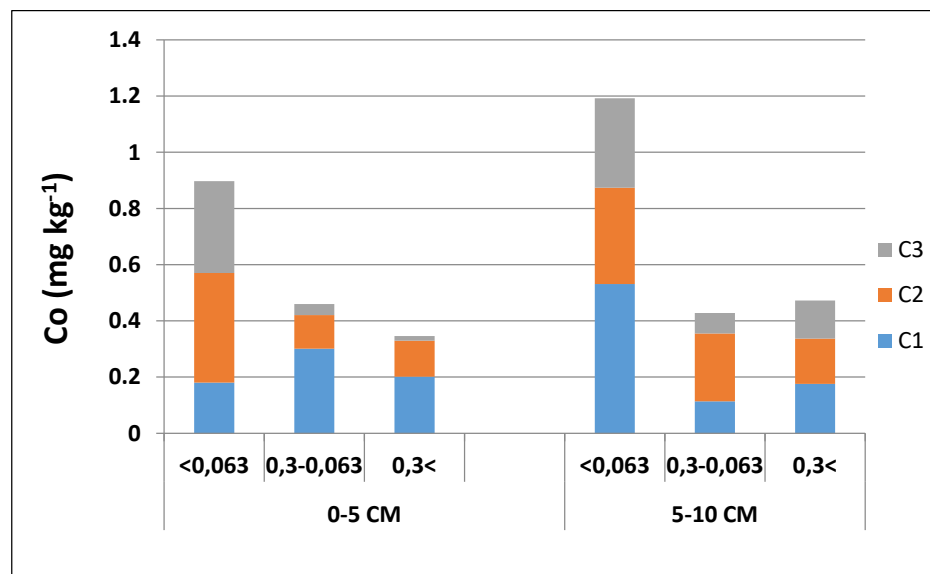

Supplementary figure S17. Cumulative cobalt concentrations at different depths in core samples taken from 3 stations in Lake Bafa ( $\text{mg kg}^{-1}$  dry weight).

Supplementary table S11. Nickel values obtained from sediment samples taken from 10 stations in Bafa Lake during 4 seasons (mg kg<sup>-1</sup> dry weight).

|                       | Station 1 | Station 2 | Station 3 | Station 4 | Station 5 | Station 6 | Station 7     | Station 8 | Station 9 | Station 10    | Average<br>(Monthly) |
|-----------------------|-----------|-----------|-----------|-----------|-----------|-----------|---------------|-----------|-----------|---------------|----------------------|
| <b>SPRING</b>         | 243.65    | 174.74    | 115.96    | 283.43    | 264.87    | 192.03    | 126.24        | 245.28    | 337.74    | 357.22        | 234.12               |
| <b>SUMMER</b>         | 264.45    | 243.20    | 230.36    | 287.49    | 203.68    | 137.60    | <b>106.92</b> | 255.03    | 237.16    | <b>373.48</b> | 233.94               |
| <b>FALL</b>           | 262.58    | 217.63    | 231.21    | 162.34    | 367.87    | 154.53    | 159.48        | 195.22    | 325.14    | 141.28        | 221.73               |
| <b>WINTER</b>         | 185.78    | 206.71    | 270.20    | 186.07    | 355.66    | 197.50    | 163.45        | 238.36    | 346.59    | 248.00        | 239.83               |
| <b>Average (Sta.)</b> | 239.12    | 210.57    | 211.93    | 229.83    | 298.02    | 170.42    | 139.02        | 233.47    | 311.66    | 280.00        |                      |

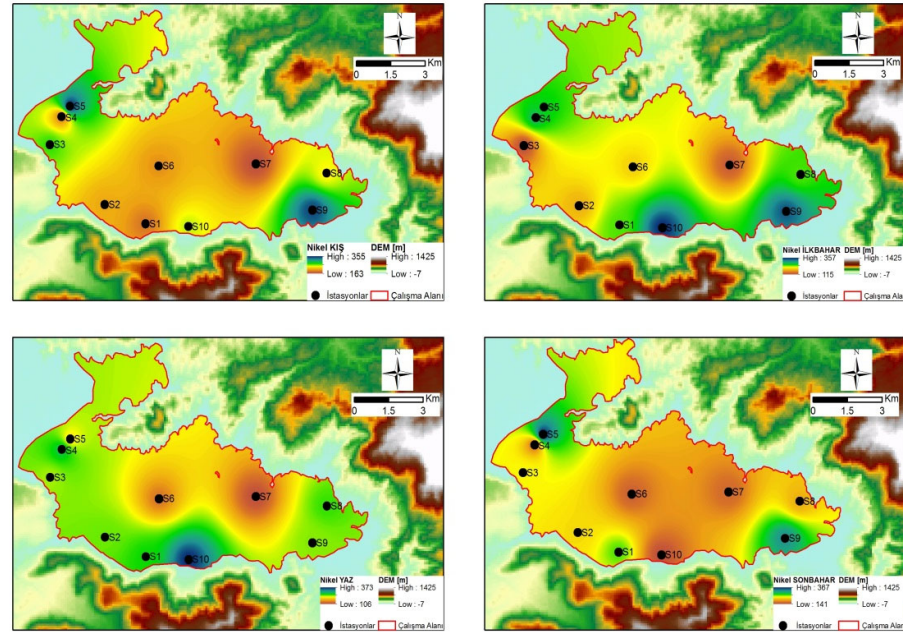

Supplementary figure S18. Map of seasonally determined Ni values in sediment samples from 10 stations in Lake Bafa.



Supplementary table S12. Cadmium values obtained from sediment samples taken from 10 stations in Lake Bafa during 4 seasons (mg kg<sup>-1</sup> dry weight).

|                       | Station 1   | Station 2   | Station 3 | Station 4 | Station 5   | Station 6   | Station 7   | Station 8 | Station 9 | Station 10  | Average<br>(Monthly) |
|-----------------------|-------------|-------------|-----------|-----------|-------------|-------------|-------------|-----------|-----------|-------------|----------------------|
| <b>SPRING</b>         | 0.07        | 0.04        | 0.06      | 0.03      | 0.04        | 0.03        | 0.03        | 0.09      | 0.03      | <b>0.20</b> | 0.06                 |
| <b>SUMMER</b>         | 0.11        | 0.12        | 0.11      | 0.14      | 0.15        | 0.10        | 0.10        | 0.12      | 0.13      | 0.12        | 0.12                 |
| <b>FALL</b>           | 0.03        | <b>0.20</b> | 0.06      | 0.03      | <b>0.02</b> | <b>0.02</b> | <b>0.02</b> | 0.06      | 0.04      | <b>0.02</b> | 0.05                 |
| <b>WINTER</b>         | <b>0.02</b> | 0.07        | 0.03      | 0.03      | 0.12        | 0.10        | 0.12        | 0.14      | 0.15      | 0.11        | 0.09                 |
| <b>Average (Sta.)</b> | 0.06        | 0.11        | 0.07      | 0.06      | 0.08        | 0.06        | 0.07        | 0.10      | 0.09      | 0.11        |                      |

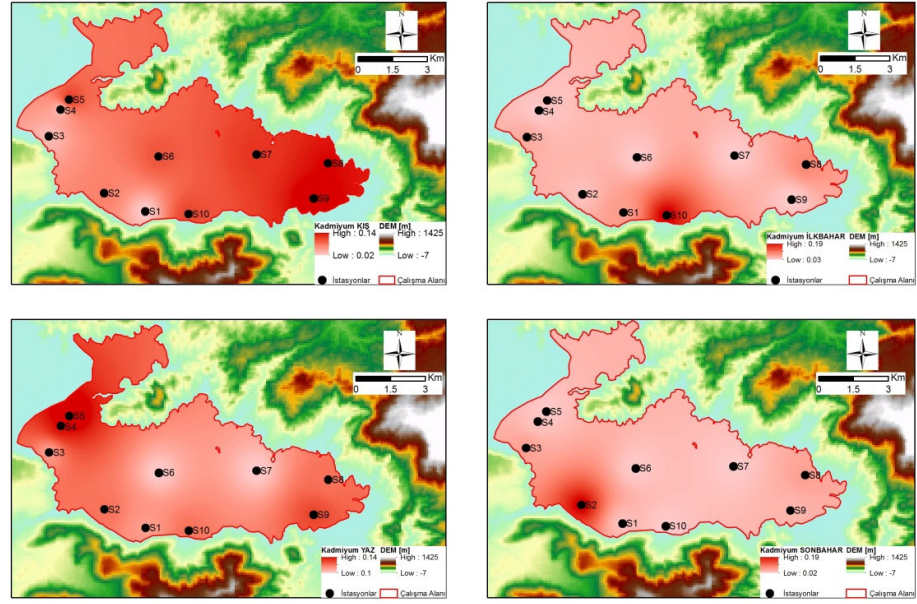

Supplementary figure S19. Map of seasonally determined Cd values in sediment samples from 10 stations in Lake Bafa.

Supplementary table S13. Cadmium values obtained from sediment core samples taken from 3 stations in Lake Bafa ( $\text{mg kg}^{-1}$  dry weight).

|                | 0-5 cm |           |      | 5-10 cm |           |      |
|----------------|--------|-----------|------|---------|-----------|------|
|                | <0.063 | 0.3-0.063 | 0.3< | <0.063  | 0.3-0.063 | 0.3< |
| C <sub>1</sub> | 0.07   | 0.12      | 0.07 | 0.14    | 0.02      | 0.05 |
| C <sub>2</sub> | 0.10   | 0.02      | 0.01 | 0.12    | 0.02      | 0.07 |
| C <sub>3</sub> | 0.12   | 0.00      | 0.01 | 0.12    | 0.00      | 0.11 |

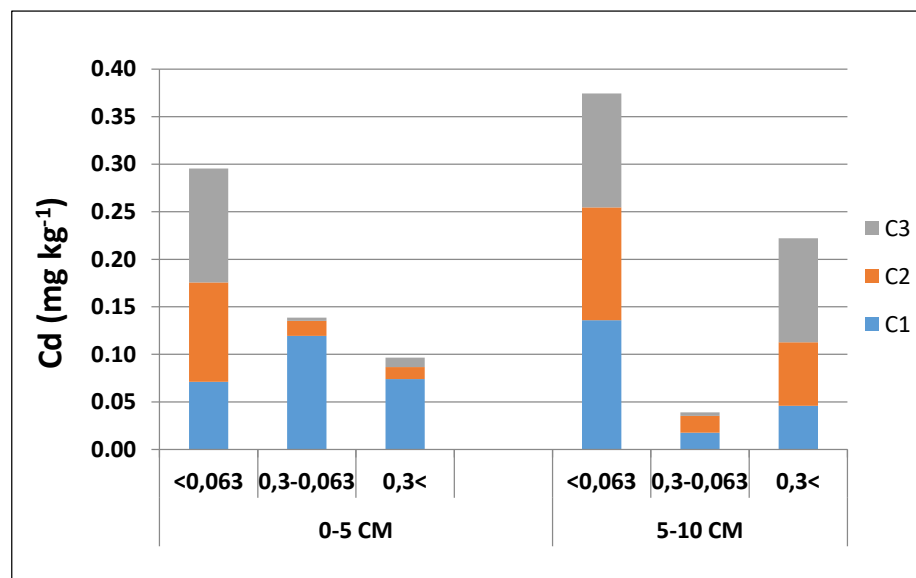

Supplementary figure S20. Cumulative Cd concentrations at different depths in core samples taken from 3 stations in Lake Bafa ( $\text{mg kg}^{-1}$  dry weight).

Supplementary table S14. Lead values obtained from sediment samples taken from 10 stations in Bafa Lake during 4 seasons (mg kg<sup>-1</sup> dry weight).

|                       | Station 1 | Station 2    | Station 3 | Station 4 | Station 5 | Station 6 | Station 7 | Station 8 | Station 9    | Station 10 | Average<br>(Monthly) |
|-----------------------|-----------|--------------|-----------|-----------|-----------|-----------|-----------|-----------|--------------|------------|----------------------|
| <b>SPRING</b>         | 14.31     | 13.57        | 13.50     | 15.12     | 17.46     | 20.23     | 11.98     | 13.72     | <b>27.57</b> | 17.52      | 16.50                |
| <b>SUMMER</b>         | 15.64     | <b>11.02</b> | 18.09     | 15.48     | 11.67     | 15.41     | 16.30     | 17.48     | 15.15        | 12.28      | 14.85                |
| <b>FALL</b>           | 13.55     | 20.69        | 12.91     | 11.56     | 12.31     | 12.55     | 12.56     | 12.75     | 11.38        | 12.51      | 13.28                |
| <b>WINTER</b>         | 13.97     | 14.19        | 17.47     | 14.06     | 14.19     | 14.62     | 16.36     | 13.40     | 13.27        | 12.13      | 14.37                |
| <b>Average (Sta.)</b> | 14.37     | 14.87        | 15.49     | 14.05     | 13.91     | 15.70     | 14.30     | 14.34     | 16.84        | 13.61      |                      |

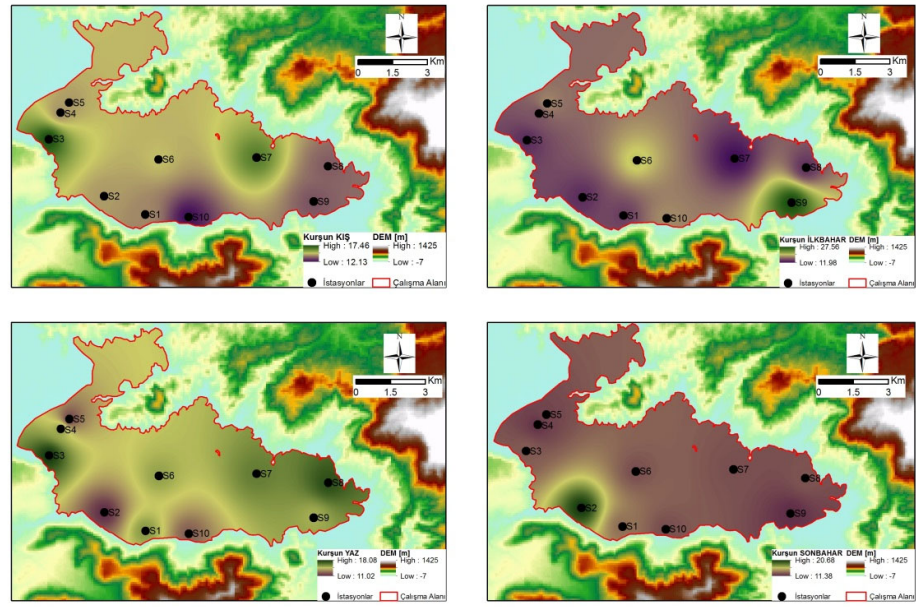

Supplementary figure S21. The map of seasonally determined Pb values in sediment samples from 10 stations in Lake Bafa.

Supplementary table S15. Lead values obtained from sediment core samples taken from 3 stations in Lake Bafa ( $\text{mg kg}^{-1}$  dry weight).

|                | 0-5 cm |           |      | 5-10 cm |           |      |
|----------------|--------|-----------|------|---------|-----------|------|
|                | <0.063 | 0.3-0.063 | 0.3< | <0.063  | 0.3-0.063 | 0.3< |
| C <sub>1</sub> | 5.15   | 3.79      | 3.85 | 7.80    | 1.93      | 3.07 |
| C <sub>2</sub> | 9.44   | 0.38      | 2.98 | 6.32    | 2.36      | 4.11 |
| C <sub>3</sub> | 11.34  | 1.30      | 0.16 | 6.48    | 2.41      | 2.91 |

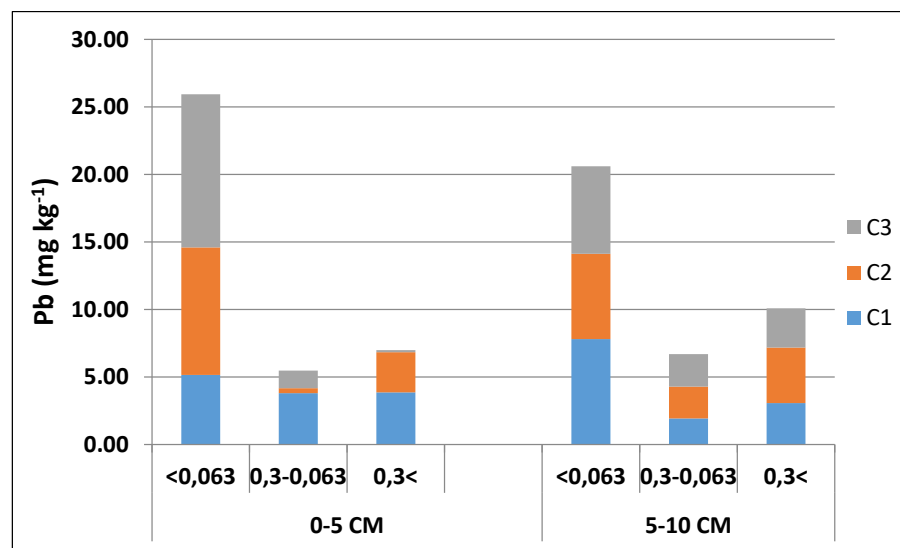

Supplementary figure S22. Cumulative Pb concentrations at different depths in core samples taken from 3 stations in Lake Bafa ( $\text{mg kg}^{-1}$  dry weight).

Supplementary table S16. Zinc values obtained from sediment samples taken from 10 stations in Bafa Lake during 4 seasons. (mg kg<sup>-1</sup> dry weight).

|                       | Station 1    | Station 2 | Station 3 | Station 4 | Station 5 | Station 6 | Station 7 | Station 8    | Station 9 | Station 10 | Average<br>(Monthly) |
|-----------------------|--------------|-----------|-----------|-----------|-----------|-----------|-----------|--------------|-----------|------------|----------------------|
| <b>SPRING</b>         | 36.70        | 45.30     | 56.34     | 50.29     | 59.31     | 82.43     | 48.82     | 61.07        | 57.19     | 72.65      | 57.01                |
| <b>SUMMER</b>         | 51.91        | 53.38     | 64.30     | 58.52     | 58.12     | 60.01     | 60.32     | 71.38        | 71.39     | 73.79      | 62.31                |
| <b>FALL</b>           | <b>87.17</b> | 58.66     | 46.36     | 62.71     | 36.81     | 60.61     | 27.20     | <b>22.03</b> | 60.68     | 69.87      | 53.21                |
| <b>WINTER</b>         | 46.23        | 41.71     | 52.18     | 55.10     | 55.00     | 54.68     | 61.04     | 54.67        | 55.45     | 51.28      | 52.73                |
| <b>Average (Sta.)</b> | 55.50        | 49.76     | 54.80     | 56.66     | 52.31     | 64.43     | 49.35     | 52.29        | 61.18     | 66.90      |                      |

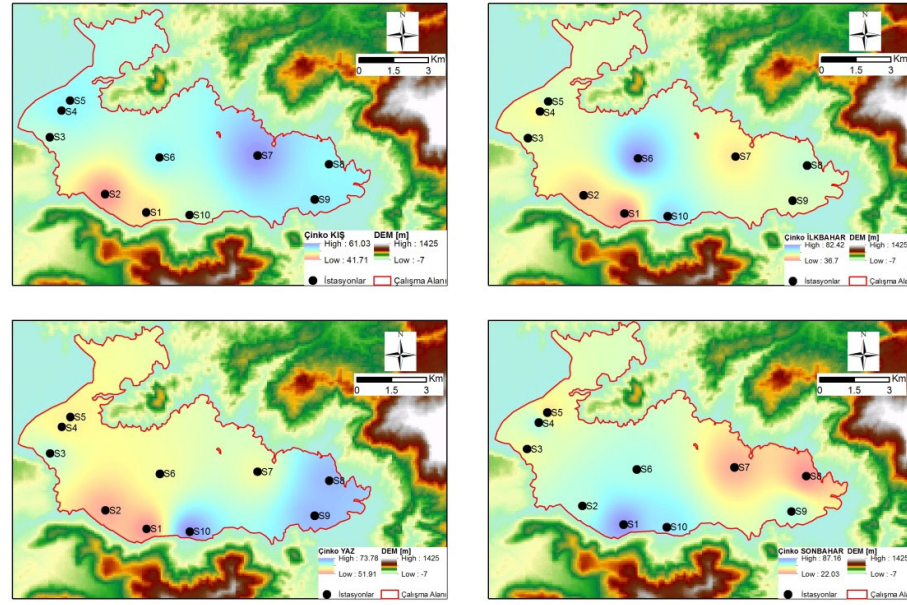

Supplementary figure S23. The Map of seasonally determined Zn values in sediment samples from 10 stations in Lake Bafa.



Supplementary table S17. Zinc values obtained from sediment core samples taken from 3 stations in Lake Bafa ( $\text{mg kg}^{-1}$  dry weight).

|                | 0-5 cm |           |       | 5-10 cm |           |       |
|----------------|--------|-----------|-------|---------|-----------|-------|
|                | <0.063 | 0.3-0.063 | 0.3<  | <0.063  | 0.3-0.063 | 0.3<  |
| C <sub>1</sub> | 11.61  | 21.44     | 34.10 | 40.61   | 10.82     | 15.73 |
| C <sub>2</sub> | 36.02  | 12.72     | 18.41 | 15.97   | 26.15     | 25.04 |
| C <sub>3</sub> | 62.84  | 4.32      | 0.00  | 21.36   | 7.86      | 37.95 |

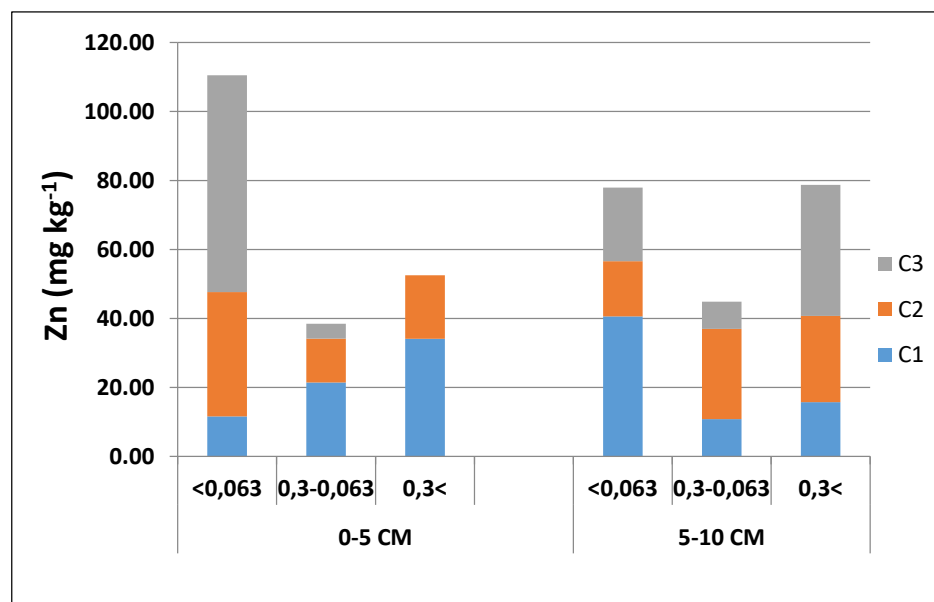

Supplementary figure S24. Cumulative Zn concentrations at different depths in core samples from 3 stations in Lake Bafa ( $\text{mg kg}^{-1}$  dry weight).

### Physical and Chemical Characteristics of Lake Water

The monthly mean values of the main meteorological parameters during the sampling period (2013-2014), were obtained by the Ministry of Forestry and Water Affairs, Aydın Provincial Directorate (Supplementary table 18.).

**Supplementary table S18.** Data on meteorological events in the 1-year period (2013-2014) in Lake Bafa (Anonymous, 2015).

|                  | Temperature (°C) | Humidity (%) | Wind speed (m s <sup>-2</sup> ) | Areal precipitation (kg m <sup>-2</sup> ) |
|------------------|------------------|--------------|---------------------------------|-------------------------------------------|
| <b>JANUARY</b>   | 11.7             | 81.9         | 2.0                             | 121.4                                     |
| <b>FEBRUARY</b>  | 11.9             | 75.4         | 2.5                             | 39.4                                      |
| <b>MARCH</b>     | 13.1             | 68.6         | 3.1                             | 88.8                                      |
| <b>APRIL</b>     | 16.2             | 72.4         | 2.2                             | 107.6                                     |
| <b>MAY</b>       | 20.2             | 66.2         | 3.2                             | 27.8                                      |
| <b>JUNE</b>      | 24.9             | 55.0         | 3.3                             | 53.0                                      |
| <b>JULY</b>      | 27.2             | 54.5         | 4.2                             | 1.0                                       |
| <b>AUGUST</b>    | 28.2             | 55.4         | 4.0                             | 18.4                                      |
| <b>SEPTEMBER</b> | 23.6             | 62.3         | 3.1                             | 36.8                                      |
| <b>OCTOBER</b>   | 19.6             | 65.8         | 3.3                             | 37.0                                      |
| <b>NOVEMBER</b>  | 14.3             | 69.8         | 2.5                             | 81.2                                      |
| <b>DECEMBER</b>  | 9.3              | 56.7         | 3.3                             | 16.0                                      |

The physico-chemical parameters measured in the surface water samples taken from 10 different points during 1 year from Lake Bafa are reported in Supplementary table 19 and 20.

**Supplementary table S19.** Monthly mean of physico-chemical parameters measured from 10 Stations in Lake Bafa.

|                  | Water temperature (°C) | Conductivity ( $\mu\text{S cm}^{-1}$ ) | TDS ( $\text{g L}^{-1}$ ) | Salinity (‰) | Oxygen saturation (%) | DO ( $\text{mg L}^{-1}$ ) | pH   |
|------------------|------------------------|----------------------------------------|---------------------------|--------------|-----------------------|---------------------------|------|
| <b>JANUARY</b>   | 11.78                  | 18188                                  | 11.82                     | 10.81        | 118.38                | 12.41                     | 8.91 |
| <b>FEBRUARY</b>  | 15.00                  | 17417                                  | 15.50                     | 11.13        | 96.51                 | 9.54                      | 8.74 |
| <b>MARCH</b>     | 18.22                  | 16646                                  | 19.17                     | 11.44        | 74.64                 | 6.68                      | 8.58 |
| <b>APRIL</b>     | 22.14                  | 15912                                  | 20.32                     | 11.49        | 76.88                 | 6.88                      | 8.41 |
| <b>MAY</b>       | 23.30                  | 17547                                  | 15.27                     | 10.68        | 67.77                 | 5.48                      | 8.16 |
| <b>JUNE</b>      | 25.70                  | 18858                                  | 12.10                     | 11.01        | 145.92                | 11.18                     | 8.32 |
| <b>JULY</b>      | 27.55                  | 20215                                  | 12.97                     | 11.27        | 67.41                 | 6.03                      | 8.31 |
| <b>AUGUST</b>    | 27.63                  | 20280                                  | 13.01                     | 11.30        | 62.74                 | 5.62                      | 7.74 |
| <b>SEPTEMBER</b> | 23.04                  | 18540                                  | 12.75                     | 11.38        | 98.26                 | 8.67                      | 7.97 |
| <b>OCTOBER</b>   | 18.45                  | 16801                                  | 12.49                     | 11.46        | 133.78                | 11.73                     | 8.19 |
| <b>NOVEMBER</b>  | 13.90                  | 17137                                  | 12.54                     | 11.42        | 119.06                | 11.38                     | 8.48 |
| <b>DECEMBER</b>  | 9.35                   | 19570                                  | 12.72                     | 11.64        | 131.45                | 13.82                     | 9.67 |

**Supplementary table S20.** The mean of physico-chemical parameters of 10 Stations in Lake Bafa in terms of Stations.

|                   | Water temperature (°C) | Conductivity ( $\mu\text{S cm}^{-1}$ ) | TDS ( $\text{g L}^{-1}$ ) | Salinity (‰) | Oxygen Saturation (%) | DO ( $\text{mg L}^{-1}$ ) | pH   |
|-------------------|------------------------|----------------------------------------|---------------------------|--------------|-----------------------|---------------------------|------|
| <b>Station 1</b>  | 19.68                  | 17992                                  | 14.13                     | 11.19        | 93.08                 | 8.46                      | 8.29 |
| <b>Station 2</b>  | 19.44                  | 17791                                  | 14.06                     | 11.23        | 103.29                | 9.25                      | 8.45 |
| <b>Station 3</b>  | 18.63                  | 17735                                  | 14.25                     | 11.25        | 100.63                | 9.32                      | 8.46 |
| <b>Station 4</b>  | 18.61                  | 17896                                  | 14.32                     | 11.29        | 96.15                 | 8.96                      | 8.44 |
| <b>Station 5</b>  | 19.64                  | 18367                                  | 14.41                     | 11.25        | 95.31                 | 9.07                      | 8.45 |
| <b>Station 6</b>  | 19.86                  | 18241                                  | 14.34                     | 11.31        | 102.98                | 9.35                      | 8.55 |
| <b>Station 7</b>  | 20.31                  | 18300                                  | 14.25                     | 11.21        | 117.13                | 10.55                     | 8.58 |
| <b>Station 8</b>  | 20.32                  | 18299                                  | 14.20                     | 11.27        | 89.72                 | 8.21                      | 8.46 |
| <b>Station 9</b>  | 20.19                  | 18255                                  | 14.20                     | 11.29        | 91.00                 | 8.46                      | 8.46 |
| <b>Station 10</b> | 20.07                  | 18044                                  | 14.06                     | 11.23        | 104.71                | 9.54                      | 8.44 |

**Supplementary table S21.** Water temperature values (°C) by month, measured from 10 stations in Lake Bafa.

|                  | Station 1 | Station 2 | Station 3 | Station 4 | Station 5  | Station 6 | Station 7   | Station 8 | Station 9 | Station 10 |
|------------------|-----------|-----------|-----------|-----------|------------|-----------|-------------|-----------|-----------|------------|
| <b>JANUARY</b>   | 12.4      | 11.8      | 11.8      | 10.1      | 9.6        | 12.4      | 12.5        | 12.3      | 12.4      | 12.5       |
| <b>FEBRUARY</b>  | 15.7      | 15.0      | 14.6      | 13.5      | 14.0       | 15.3      | 15.3        | 15.4      | 15.5      | 15.9       |
| <b>MARCH</b>     | 19.0      | 18.1      | 17.4      | 16.9      | 18.3       | 18.1      | 18.0        | 18.5      | 18.6      | 19.4       |
| <b>APRIL</b>     | 22.9      | 21.9      | 20.7      | 21.1      | 24.0       | 21.4      | 21.2        | 22.3      | 22.3      | 23.6       |
| <b>MAY</b>       | 23.1      | 23.1      | 22.4      | 22.4      | 23.4       | 23.2      | 23.7        | 24.6      | 23.6      | 23.9       |
| <b>JUNE</b>      | 25.2      | 25.9      | 23.2      | 24.5      | 25.7       | 25.9      | 27.0        | 26.9      | 27.0      | 25.7       |
| <b>JULY</b>      | 26.5      | 26.7      | 25.1      | 26.7      | 28.8       | 28.0      | 29.4        | 28.8      | 28.4      | 27.2       |
| <b>AUGUST</b>    | 26.6      | 26.7      | 25.1      | 26.8      | 28.9       | 28.1      | <b>29.5</b> | 28.9      | 28.5      | 27.3       |
| <b>SEPTEMBER</b> | 22.5      | 22.5      | 21.8      | 22.4      | 23.7       | 23.3      | 24.1        | 23.7      | 23.5      | 22.9       |
| <b>OCTOBER</b>   | 18.4      | 18.3      | 18.4      | 18.0      | 18.6       | 18.6      | 18.7        | 18.5      | 18.6      | 18.4       |
| <b>NOVEMBER</b>  | 14.1      | 13.8      | 13.9      | 13.0      | 13.1       | 14.2      | 14.3        | 14.1      | 14.2      | 14.2       |
| <b>DECEMBER</b>  | 9.8       | 9.4       | 9.3       | 8.0       | <b>7.6</b> | 9.9       | 9.9         | 9.8       | 9.8       | 9.9        |

**Supplementary table S22.** Dissolved oxygen values by months measured from 10 stations in Lake Bafa. (mg L<sup>-1</sup>).

|                  | Station 1 | Station 2 | Station 3 | Station 4 | Station 5 | Station 6 | Station 7    | Station 8 | Station 9   | Station 10 |
|------------------|-----------|-----------|-----------|-----------|-----------|-----------|--------------|-----------|-------------|------------|
| <b>JANUARY</b>   | 9.31      | 11.26     | 11.54     | 11.62     | 10.27     | 12.43     | 12.64        | 11.73     | 12.93       | 13.33      |
| <b>FEBRUARY</b>  | 8.30      | 9.34      | 8.89      | 8.76      | 11.96     | 9.68      | 9.32         | 8.44      | 10.23       | 10.49      |
| <b>MARCH</b>     | 7.29      | 7.43      | 6.25      | 5.91      | 6.64      | 6.93      | 6.00         | 5.15      | 7.53        | 7.66       |
| <b>APRIL</b>     | 7.51      | 7.65      | 6.44      | 6.09      | 6.84      | 7.14      | 6.18         | 5.30      | 7.76        | 7.89       |
| <b>MAY</b>       | 5.89      | 5.53      | 5.91      | 6.14      | 4.61      | 6.20      | 6.85         | 6.04      | <b>1.84</b> | 5.83       |
| <b>JUNE</b>      | 10.26     | 13.47     | 11.42     | 11.87     | 8.66      | 16.50     | <b>17.46</b> | 6.37      | 5.15        | 10.62      |
| <b>JULY</b>      | 6.38      | 6.58      | 5.67      | 5.42      | 5.95      | 6.35      | 5.56         | 4.88      | 6.67        | 6.86       |
| <b>AUGUST</b>    | 5.95      | 6.06      | 5.22      | 5.07      | 5.73      | 5.88      | 5.15         | 4.56      | 6.21        | 6.33       |
| <b>SEPTEMBER</b> | 7.62      | 8.80      | 9.80      | 8.93      | 6.87      | 7.97      | 10.93        | 8.59      | 8.41        | 8.82       |
| <b>OCTOBER</b>   | 9.29      | 11.53     | 14.38     | 12.80     | 8.01      | 10.06     | 16.70        | 12.62     | 10.62       | 11.31      |
| <b>NOVEMBER</b>  | 9.01      | 11.18     | 13.95     | 12.42     | 7.77      | 9.76      | 16.20        | 12.24     | 10.30       | 10.97      |
| <b>DECEMBER</b>  | 14.77     | 12.11     | 12.41     | 12.50     | 10.58     | 13.37     | 13.60        | 12.62     | 13.91       | 14.34      |

**Supplementary table S23.** Oxygen saturation values by months measured from 10 stations in Lake Bafa (%).

|                  | Station 1 | Station 2 | Station 3 | Station 4 | Station 5 | Station 6 | Station 7     | Station 8 | Station 9    | Station 10 |
|------------------|-----------|-----------|-----------|-----------|-----------|-----------|---------------|-----------|--------------|------------|
| <b>JANUARY</b>   | 93.20     | 114.89    | 107.92    | 108.01    | 115.09    | 118.51    | 120.84        | 112.75    | 123.07       | 127.53     |
| <b>FEBRUARY</b>  | 88.05     | 98.99     | 88.26     | 86.11     | 115.74    | 97.76     | 93.72         | 85.28     | 103.63       | 107.57     |
| <b>MARCH</b>     | 82.90     | 83.10     | 68.60     | 64.20     | 74.40     | 77.00     | 66.60         | 57.80     | 84.20        | 87.60      |
| <b>APRIL</b>     | 85.39     | 85.59     | 70.66     | 66.13     | 76.63     | 79.31     | 68.60         | 59.53     | 86.73        | 90.23      |
| <b>MAY</b>       | 70.30     | 67.90     | 72.50     | 75.20     | 57.00     | 77.00     | 85.60         | 77.10     | <b>23.10</b> | 72.00      |
| <b>JUNE</b>      | 132.40    | 177.50    | 142.90    | 151.50    | 113.20    | 213.10    | <b>234.30</b> | 86.20     | 69.30        | 138.80     |
| <b>JULY</b>      | 72.58     | 73.61     | 62.18     | 58.85     | 66.67     | 70.59     | 61.74         | 54.77     | 74.58        | 78.50      |
| <b>AUGUST</b>    | 67.64     | 67.79     | 57.33     | 55.03     | 64.20     | 65.29     | 57.17         | 51.16     | 69.44        | 72.38      |
| <b>SEPTEMBER</b> | 86.02     | 99.30     | 110.76    | 99.71     | 77.65     | 90.60     | 124.48        | 97.78     | 95.57        | 100.74     |
| <b>OCTOBER</b>   | 104.40    | 130.80    | 164.20    | 144.40    | 91.10     | 115.90    | 191.80        | 144.40    | 121.70       | 129.10     |
| <b>NOVEMBER</b>  | 92.92     | 116.41    | 146.14    | 128.52    | 81.08     | 103.15    | 170.70        | 128.52    | 108.31       | 114.90     |
| <b>DECEMBER</b>  | 141.20    | 123.60    | 116.10    | 116.20    | 119.00    | 127.50    | 130.00        | 121.30    | 132.40       | 137.20     |

**Supplementary table S24.** Chlorophyll-a amounts obtained from 10 stations in Lake Bafa for 6 months (May-October 2014) (mg L<sup>-1</sup>).

|                  | Station 1 | Station 2 | Station 3 | Station 4 | Station 5 | Station 6 | Station 7 | Station 8    | Station 9 | Station 10  |
|------------------|-----------|-----------|-----------|-----------|-----------|-----------|-----------|--------------|-----------|-------------|
| <b>MAY</b>       | 1.35      | 0.51      | 6.87      | 2.55      | 2.51      | 4.36      | 6.51      | 18.43        | 2.36      | <b>0.79</b> |
| <b>JUNE</b>      | 3.38      | 3.46      | 14.01     | 15.95     | 13.37     | 8.58      | 10.14     | 33.57        | 30.58     | 2.88        |
| <b>JULY</b>      | 2.60      | 4.00      | 15.56     | 14.16     | 13.84     | 6.21      | 13.62     | <b>35.57</b> | 32.68     | 3.16        |
| <b>AUGUST</b>    | 1.06      | 1.23      | 6.27      | 7.03      | 4.90      | 2.44      | 7.83      | 16.42        | 12.76     | 3.86        |
| <b>SEPTEMBER</b> | 13.33     | 4.42      | 18.73     | 18.77     | 14.80     | 5.79      | 14.30     | 33.64        | 27.24     | 4.37        |
| <b>OCTOBER</b>   | 3.82      | 4.28      | 13.72     | 16.74     | 11.37     | 10.19     | 6.52      | 27.82        | 32.55     | 3.08        |

**Supplementary table S25.** pH values by months measured from 10 stations in Lake Bafa.

|                  | Station 1 | Station 2 | Station 3 | Station 4 | Station 5   | Station 6 | Station 7 | Station 8 | Station 9 | Station 10  |
|------------------|-----------|-----------|-----------|-----------|-------------|-----------|-----------|-----------|-----------|-------------|
| <b>JANUARY</b>   | 8.16      | 9.04      | 9.03      | 9.05      | 9.07        | 8.91      | 8.95      | 8.99      | 8.93      | 8.94        |
| <b>FEBRUARY</b>  | 8.30      | 8.78      | 8.73      | 8.76      | 8.87        | 8.78      | 8.80      | 8.75      | 8.90      | 8.78        |
| <b>MARCH</b>     | 8.43      | 8.52      | 8.44      | 8.47      | 8.66        | 8.64      | 8.65      | 8.51      | 8.87      | 8.62        |
| <b>APRIL</b>     | 8.26      | 8.35      | 8.27      | 8.30      | 8.49        | 8.47      | 8.48      | 8.34      | 8.69      | 8.45        |
| <b>MAY</b>       | 8.22      | 8.21      | 8.21      | 8.21      | 7.99        | 8.24      | 8.29      | 8.21      | 7.80      | 8.25        |
| <b>JUNE</b>      | 8.22      | 8.45      | 8.24      | 8.27      | 8.14        | 8.55      | 8.60      | 8.26      | 8.14      | 8.31        |
| <b>JULY</b>      | 8.26      | 8.24      | 8.29      | 8.35      | 8.42        | 8.65      | 8.28      | 8.19      | 8.24      | 8.20        |
| <b>AUGUST</b>    | 7.70      | 7.59      | 7.64      | 7.81      | 8.11        | 8.00      | 7.67      | 7.65      | 7.67      | <b>7.56</b> |
| <b>SEPTEMBER</b> | 7.86      | 7.89      | 8.03      | 8.00      | 7.99        | 8.02      | 8.11      | 8.00      | 7.91      | 7.86        |
| <b>OCTOBER</b>   | 8.02      | 8.19      | 8.42      | 8.20      | 7.88        | 8.04      | 8.55      | 8.35      | 8.14      | 8.15        |
| <b>NOVEMBER</b>  | 8.36      | 8.41      | 8.54      | 8.12      | 8.03        | 8.65      | 8.97      | 8.56      | 8.61      | 8.53        |
| <b>DECEMBER</b>  | 9.68      | 9.73      | 9.71      | 9.74      | <b>9.76</b> | 9.59      | 9.63      | 9.67      | 9.61      | 9.62        |

**Supplementary table S26.** Salinity values by months measured from 10 stations in Lake Bafa (‰).

|                  | Station 1 | Station 2 | Station 3 | Station 4 | Station 5    | Station 6 | Station 7 | Station 8 | Station 9    | Station 10 |
|------------------|-----------|-----------|-----------|-----------|--------------|-----------|-----------|-----------|--------------|------------|
| <b>JANUARY</b>   | 10.83     | 10.88     | 10.88     | 10.88     | 10.31        | 10.87     | 10.88     | 10.88     | 10.87        | 10.88      |
| <b>FEBRUARY</b>  | 11.13     | 11.10     | 11.17     | 11.25     | 11.07        | 11.18     | 11.12     | 11.16     | 11.13        | 10.96      |
| <b>MARCH</b>     | 11.42     | 11.31     | 11.47     | 11.61     | 11.83        | 11.49     | 11.37     | 11.45     | 11.40        | 11.05      |
| <b>APRIL</b>     | 11.47     | 11.36     | 11.52     | 11.66     | <b>11.88</b> | 11.54     | 11.42     | 11.50     | 11.45        | 11.09      |
| <b>MAY</b>       | 10.70     | 10.70     | 10.71     | 10.71     | 10.73        | 10.70     | 10.69     | 10.65     | <b>10.55</b> | 10.70      |
| <b>JUNE</b>      | 10.96     | 10.98     | 11.02     | 10.99     | 11.13        | 10.98     | 11.00     | 11.03     | 11.04        | 10.98      |
| <b>JULY</b>      | 11.07     | 11.31     | 11.24     | 11.32     | 11.35        | 11.31     | 11.11     | 11.31     | 11.29        | 11.36      |
| <b>AUGUST</b>    | 11.11     | 11.34     | 11.28     | 11.36     | 11.38        | 11.35     | 11.15     | 11.35     | 11.33        | 11.39      |
| <b>SEPTEMBER</b> | 11.24     | 11.31     | 11.26     | 11.35     | 11.46        | 11.53     | 11.33     | 11.42     | 11.45        | 11.45      |
| <b>OCTOBER</b>   | 11.37     | 11.29     | 11.25     | 11.33     | 11.54        | 11.70     | 11.51     | 11.50     | 11.56        | 11.51      |
| <b>NOVEMBER</b>  | 11.35     | 11.42     | 11.48     | 11.36     | 11.25        | 11.37     | 11.23     | 11.33     | 11.78        | 11.65      |
| <b>DECEMBER</b>  | 11.70     | 11.71     | 11.70     | 11.71     | 11.09        | 11.69     | 11.70     | 11.70     | 11.69        | 11.70      |

**Supplementary table S27.** TDS values by months measured from 10 stations in Lake Bafa (g L<sup>-1</sup>).

|                  | Station 1 | Station 2 | Station 3 | Station 4 | Station 5    | Station 6 | Station 7 | Station 8 | Station 9 | Station 10 |
|------------------|-----------|-----------|-----------|-----------|--------------|-----------|-----------|-----------|-----------|------------|
| <b>JANUARY</b>   | 11.87     | 11.89     | 11.88     | 11.91     | <b>11.34</b> | 11.86     | 11.87     | 11.87     | 11.87     | 11.88      |
| <b>FEBRUARY</b>  | 15.50     | 15.48     | 15.61     | 15.66     | 15.52        | 15.62     | 15.44     | 15.43     | 15.48     | 15.23      |
| <b>MARCH</b>     | 19.12     | 19.07     | 19.35     | 19.42     | 19.70        | 19.37     | 19.01     | 18.99     | 19.09     | 18.58      |
| <b>APRIL</b>     | 20.27     | 20.21     | 20.51     | 20.59     | <b>20.88</b> | 20.53     | 20.15     | 20.13     | 20.24     | 19.69      |
| <b>MAY</b>       | 15.26     | 15.25     | 15.37     | 15.41     | 15.31        | 15.37     | 15.22     | 15.22     | 15.27     | 15.04      |
| <b>JUNE</b>      | 12.06     | 12.07     | 12.08     | 12.07     | 12.21        | 12.06     | 12.10     | 12.13     | 12.15     | 12.06      |
| <b>JULY</b>      | 12.66     | 12.43     | 13.04     | 13.16     | 13.68        | 13.02     | 13.19     | 12.98     | 12.76     | 12.79      |
| <b>AUGUST</b>    | 12.70     | 12.46     | 13.09     | 13.21     | 13.71        | 13.07     | 13.24     | 13.02     | 12.80     | 12.82      |
| <b>SEPTEMBER</b> | 12.55     | 12.39     | 12.68     | 12.79     | 13.14        | 12.90     | 12.89     | 12.77     | 12.70     | 12.69      |
| <b>OCTOBER</b>   | 12.40     | 12.32     | 12.27     | 12.37     | 12.56        | 12.73     | 12.54     | 12.53     | 12.59     | 12.56      |
| <b>NOVEMBER</b>  | 12.45     | 12.37     | 12.33     | 12.43     | 12.62        | 12.78     | 12.59     | 12.58     | 12.65     | 12.61      |
| <b>DECEMBER</b>  | 12.77     | 12.79     | 12.78     | 12.81     | 12.20        | 12.76     | 12.77     | 12.77     | 12.77     | 12.78      |

**Supplementary table S28.** The Change of ammonium nitrogen amounts by months measured for a year from 10 stations in Lake Bafa (mg L<sup>-1</sup>).

|                  | Station 1 | Station 2 | Station 3  | Station 4  | Station 5 | Station 6  | Station 7 | Station 8 | Station 9    | Station 10 |
|------------------|-----------|-----------|------------|------------|-----------|------------|-----------|-----------|--------------|------------|
| <b>JANUARY</b>   | 0.020     | 0.030     | 0.020      | 0.030      | 0.050     | 0.020      | 0.050     | 0.050     | 0.010        | <b>LOD</b> |
| <b>FEBRUARY</b>  | 0.000     | 0.020     | <b>LOD</b> | 0.060      | 0.040     | 0.030      | 0.010     | 0.020     | 0.020        | 0.030      |
| <b>MARCH</b>     | 0.110     | 0.110     | 0.080      | 0.090      | 0.090     | 0.090      | 0.080     | 0.110     | 0.160        | 0.100      |
| <b>APRIL</b>     | 0.700     | 0.500     | 0.040      | 0.050      | 0.040     | 0.070      | 0.080     | 0.100     | 0.150        | 0.100      |
| <b>MAY</b>       | 0.182     | 0.138     | 0.036      | 0.062      | 0.066     | 0.042      | 0.046     | 0.062     | 0.068        | 0.050      |
| <b>JUNE</b>      | 0.050     | 0.070     | 0.120      | <b>LOD</b> | 0.030     | 0.030      | 0.050     | 0.710     | 0.960        | 0.090      |
| <b>JULY</b>      | 0.051     | 0.074     | 0.144      | <b>LOD</b> | 0.030     | 0.029      | 0.045     | 0.738     | 1.056        | 0.096      |
| <b>AUGUST</b>    | 0.056     | 0.082     | 0.166      | <b>LOD</b> | 0.040     | 0.035      | 0.053     | 0.805     | 1.299        | 0.117      |
| <b>SEPTEMBER</b> | 0.062     | 0.092     | 0.190      | <b>LOD</b> | 0.053     | 0.043      | 0.062     | 0.877     | <b>1.598</b> | 0.143      |
| <b>OCTOBER</b>   | 0.330     | 0.280     | 0.390      | 0.430      | 0.200     | 0.330      | 0.290     | 0.220     | 0.380        | 0.300      |
| <b>NOVEMBER</b>  | 0.149     | 0.130     | 0.111      | 0.073      | 0.068     | 0.065      | 0.070     | 0.338     | 0.518        | 0.095      |
| <b>DECEMBER</b>  | 0.080     | 0.030     | 0.040      | 0.080      | 0.110     | <b>LOD</b> | 0.010     | 0.030     | <b>LOD</b>   | 0.020      |



**Supplementary table S29.** The change of nitrite nitrogen by months measured for a year from 10 stations in Lake Bafa (mg L<sup>-1</sup>).

|           | Station 1 | Station 2    | Station 3 | Station 4 | Station 5    | Station 6 | Station 7 | Station 8 | Station 9 | Station 10 |
|-----------|-----------|--------------|-----------|-----------|--------------|-----------|-----------|-----------|-----------|------------|
| JANUARY   | 0.005     | 0.004        | 0.005     | 0.009     | 0.008        | 0.008     | 0.008     | 0.005     | 0.005     | 0.004      |
| FEBRUARY  | 0.002     | 0.000        | 0.002     | 0.007     | 0.000        | 0.001     | 0.002     | 0.004     | 0.002     | 0.002      |
| MARCH     | 0.004     | 0.002        | 0.002     | 0.001     | 0.002        | 0.003     | 0.005     | 0.002     | 0.014     | 0.006      |
| APRIL     | 0.003     | <b>0.001</b> | 0.002     | 0.006     | <b>0.001</b> | 0.004     | 0.006     | 0.002     | 0.007     | 0.005      |
| MAY       | 0.003     | 0.002        | 0.003     | 0.005     | 0.003        | 0.004     | 0.005     | 0.004     | 0.006     | 0.004      |
| JUNE      | 0.038     | 0.033        | 0.001     | 0.001     | 0.025        | 0.029     | 0.009     | 0.011     | 0.013     | 0.034      |
| JULY      | 0.039     | 0.035        | 0.001     | 0.001     | 0.025        | 0.028     | 0.008     | 0.011     | 0.014     | 0.036      |
| AUGUST    | 0.043     | 0.039        | 0.001     | 0.001     | 0.033        | 0.034     | 0.009     | 0.012     | 0.018     | 0.044      |
| SEPTEMBER | 0.047     | 0.043        | 0.002     | 0.001     | 0.044        | 0.041     | 0.011     | 0.014     | 0.022     | 0.054      |
| OCTOBER   | 0.043     | 0.027        | 0.012     | 0.041     | <b>0.187</b> | 0.059     | 0.008     | 0.023     | 0.022     | 0.025      |
| NOVEMBER  | 0.009     | 0.005        | 0.002     | 0.008     | 0.037        | 0.012     | 0.002     | 0.005     | 0.004     | 0.005      |
| DECEMBER  | 0.003     | 0.003        | 0.004     | 0.004     | 0.006        | 0.003     | 0.004     | 0.006     | 0.002     | 0.003      |

**Supplementary table S30.** The change of nitrate nitrogen values by months measured for a year from 10 stations in Lake Bafa (mg L<sup>-1</sup>).

|           | Station 1 | Station 2 | Station 3     | Station 4 | Station 5 | Station 6 | Station 7    | Station 8 | Station 9 | Station 10 |
|-----------|-----------|-----------|---------------|-----------|-----------|-----------|--------------|-----------|-----------|------------|
| JANUARY   | 5.620     | 3.460     | <b>15.800</b> | 3.010     | 2.870     | 2.820     | 2.980        | 3.060     | 2.870     | 2.630      |
| FEBRUARY  | 0.421     | 9.280     | 0.474         | 7.640     | 0.571     | 0.553     | 0.311        | 0.276     | 0.237     | 0.365      |
| MARCH     | 0.287     | 0.390     | 0.223         | 0.259     | 0.284     | 0.491     | 0.261        | 0.621     | 0.369     | 0.307      |
| APRIL     | 0.354     | 0.342     | 0.368         | 0.312     | 0.298     | 0.461     | 0.316        | 0.657     | 0.246     | 0.345      |
| MAY       | 1.214     | 2.247     | 1.863         | 1.246     | 1.370     | 0.725     | 0.500        | 0.608     | 0.512     | 0.704      |
| JUNE      | 1.010     | 1.710     | 0.300         | 0.208     | 1.850     | 0.512     | 0.179        | 0.251     | 0.231     | 0.633      |
| JULY      | 1.030     | 1.796     | 0.360         | 0.198     | 1.832     | 0.492     | 0.159        | 0.261     | 0.254     | 0.677      |
| AUGUST    | 0.773     | 1.418     | 0.281         | 0.152     | 1.355     | 0.256     | 0.078        | 0.110     | 0.114     | 0.528      |
| SEPTEMBER | 0.579     | 1.121     | 0.219         | 0.117     | 1.003     | 0.133     | <b>0.038</b> | 0.046     | 0.051     | 0.412      |
| OCTOBER   | 0.469     | 0.440     | 0.490         | 0.695     | 0.498     | 0.417     | 0.589        | 0.439     | 0.325     | 0.324      |
| NOVEMBER  | 0.477     | 0.528     | 0.534         | 0.734     | 0.561     | 0.515     | 0.606        | 0.455     | 0.372     | 0.407      |
| DECEMBER  | 0.409     | 0.443     | 0.260         | 0.198     | 0.426     | 0.367     | 0.239        | 0.211     | 0.238     | 0.225      |

**Supplementary table S31.** The change of phosphate phosphorus values by months measured for a year from 10 stations in Lake Bafa (mg L<sup>-1</sup>).

|           | Station 1 | Station 2 | Station 3 | Station 4    | Station 5 | Station 6 | Station 7 | Station 8 | Station 9  | Station 10 |
|-----------|-----------|-----------|-----------|--------------|-----------|-----------|-----------|-----------|------------|------------|
| JANUARY   | 4.220     | 1.680     | 0.109     | 0.103        | 0.117     | 3.620     | 0.090     | 1.720     | 0.156      | 0.617      |
| FEBRUARY  | 0.049     | 0.045     | 0.052     | <b>4.740</b> | 0.924     | 0.054     | 0.007     | 0.054     | 0.023      | 0.054      |
| MARCH     | 0.014     | 0.037     | 0.006     | 0.448        | 0.349     | 0.619     | 0.040     | 0.018     | <b>LOD</b> | 0.046      |
| APRIL     | 0.012     | 0.045     | 0.006     | 0.612        | 0.449     | 0.586     | 0.040     | 0.019     | 0.012      | 0.035      |
| MAY       | 1.385     | 0.409     | 0.037     | 1.226        | 0.832     | 1.073     | 0.467     | 0.383     | 0.364      | 0.552      |
| JUNE      | 0.049     | 0.200     | 1.100     | 0.361        | 0.972     | 1.240     | 0.771     | 1.300     | 1.200      | 0.372      |
| JULY      | 0.050     | 0.210     | 1.320     | 0.343        | 0.962     | 1.190     | 0.686     | 1.352     | 1.320      | 0.398      |
| AUGUST    | 0.055     | 0.235     | 1.518     | 0.422        | 1.289     | 1.452     | 0.810     | 1.474     | 1.624      | 0.486      |
| SEPTEMBER | 0.041     | 0.186     | 1.184     | 0.325        | 0.954     | 0.755     | 0.397     | 0.619     | 0.731      | 0.379      |
| OCTOBER   | 0.024     | 0.257     | 0.377     | 0.184        | 0.307     | 0.493     | 0.053     | 0.232     | 0.771      | 0.266      |
| NOVEMBER  | 0.030     | 0.319     | 0.467     | 0.228        | 0.381     | 0.611     | 0.066     | 0.288     | 0.956      | 0.330      |
| DECEMBER  | 2.630     | 0.239     | 0.011     | 0.225        | 2.320     | 0.487     | 2.160     | 0.102     | 1.630      | 2.010      |

**Supplementary table S32.** Organic matter amounts obtained from SSM samples from 10 stations in Lake Bafa throughout the year (g L<sup>-1</sup>).

|                  | Station 1 | Station 2 | Station 3 | Station 4     | Station 5 | Station 6 | Station 7     | Station 8 | Station 9 | Station 10 |
|------------------|-----------|-----------|-----------|---------------|-----------|-----------|---------------|-----------|-----------|------------|
| <b>JANUARY</b>   | 0.0021    | 0.0011    | 0.0035    | 0.0003        | 0.0013    | 0.0008    | 0.0011        | 0.0032    | 0.0052    | 0.0030     |
| <b>FEBRUARY</b>  | 0.0040    | 0.0063    | 0.0025    | 0.0058        | 0.0027    | 0.0033    | 0.0074        | 0.0104    | 0.0145    | 0.0022     |
| <b>MARCH</b>     | 0.0059    | 0.0089    | 0.0019    | 0.0077        | 0.0014    | 0.0026    | 0.0240        | 0.0154    | 0.0026    | 0.0024     |
| <b>APRIL</b>     | 0.0045    | 0.0053    | 0.0034    | 0.0033        | 0.0006    | 0.0070    | 0.0126        | 0.0053    | 0.0088    | 0.0013     |
| <b>MAY</b>       | 0.0037    | 0.0051    | 0.0025    | 0.0035        | 0.0028    | 0.0029    | 0.0098        | 0.0069    | 0.0068    | 0.0019     |
| <b>JUNE</b>      | 0.0064    | 0.0173    | 0.0040    | 0.0034        | 0.0016    | 0.0096    | 0.0306        | 0.0149    | 0.0067    | 0.0053     |
| <b>JULY</b>      | 0.0040    | 0.0044    | 0.0030    | 0.0024        | 0.0012    | 0.0107    | <b>0.0309</b> | 0.0129    | 0.0040    | 0.0022     |
| <b>AUGUST</b>    | 0.0011    | 0.0023    | 0.0009    | 0.0015        | 0.0007    | 0.0019    | 0.0014        | 0.0017    | 0.0010    | 0.0012     |
| <b>SEPTEMBER</b> | 0.0021    | 0.0034    | 0.0028    | 0.0082        | 0.0039    | 0.0034    | 0.0035        | 0.0023    | 0.0058    | 0.0047     |
| <b>OCTOBER</b>   | 0.0031    | 0.0045    | 0.0047    | 0.0149        | 0.0071    | 0.0050    | 0.0055        | 0.0029    | 0.0107    | 0.0083     |
| <b>NOVEMBER</b>  | 0.0033    | 0.0064    | 0.0031    | 0.0061        | 0.0029    | 0.0061    | 0.0144        | 0.0069    | 0.0056    | 0.0043     |
| <b>DECEMBER</b>  | 0.0022    | 0.0038    | 0.0010    | <b>0.0002</b> | 0.0079    | 0.0008    | 0.0036        | 0.0005    | 0.0028    | 0.0005     |

**Supplementary table S33.** Inorganic matter amounts obtained from SSM samples from 10 stations in Lake Bafa throughout the year (g L<sup>-1</sup>).

|                  | Station 1 | Station 2 | Station 3     | Station 4 | Station 5     | Station 6     | Station 7 | Station 8 | Station 9     | Station 10 |
|------------------|-----------|-----------|---------------|-----------|---------------|---------------|-----------|-----------|---------------|------------|
| <b>JANUARY</b>   | 0.0050    | 0.0015    | 0.0052        | 0.0024    | 0.0024        | 0.0039        | 0.0067    | 0.0040    | 0.0037        | 0.0066     |
| <b>FEBRUARY</b>  | 0.0040    | 0.0170    | <b>0.0002</b> | 0.0082    | <b>0.0002</b> | <b>0.0002</b> | 0.0062    | 0.0030    | 0.0044        | 0.0038     |
| <b>MARCH</b>     | 0.0063    | 0.0247    | 0.0040        | 0.0063    | 0.0024        | 0.0096        | 0.0175    | 0.0081    | <b>0.0184</b> | 0.0069     |
| <b>APRIL</b>     | 0.0034    | 0.0162    | 0.0004        | 0.0057    | 0.0018        | 0.0008        | 0.0140    | 0.0098    | 0.0047        | 0.0047     |
| <b>MAY</b>       | 0.0040    | 0.0123    | 0.0021        | 0.0046    | 0.0023        | 0.0030        | 0.0092    | 0.0050    | 0.0066        | 0.0045     |
| <b>JUNE</b>      | 0.0013    | 0.0024    | 0.0009        | 0.0006    | 0.0003        | 0.0026        | 0.0091    | 0.0018    | 0.0013        | 0.0006     |
| <b>JULY</b>      | 0.0021    | 0.0021    | 0.0013        | 0.0010    | 0.0003        | 0.0042        | 0.0108    | 0.0058    | 0.0023        | 0.0016     |
| <b>AUGUST</b>    | 0.0007    | 0.0010    | 0.0004        | 0.0005    | 0.0003        | 0.0008        | 0.0006    | 0.0009    | 0.0005        | 0.0007     |
| <b>SEPTEMBER</b> | 0.0022    | 0.0031    | 0.0027        | 0.0041    | 0.0015        | 0.0015        | 0.0028    | 0.0020    | 0.0047        | 0.0050     |
| <b>OCTOBER</b>   | 0.0037    | 0.0052    | 0.0050        | 0.0077    | 0.0027        | 0.0021        | 0.0050    | 0.0030    | 0.0089        | 0.0093     |
| <b>NOVEMBER</b>  | 0.0020    | 0.0027    | 0.0020        | 0.0028    | 0.0010        | 0.0022        | 0.0057    | 0.0027    | 0.0036        | 0.0035     |
| <b>DECEMBER</b>  | 0.0014    | 0.0023    | 0.0006        | 0.0001    | 0.0048        | 0.0004        | 0.0015    | 0.0002    | 0.0017        | 0.0003     |

**Supplementary table S34.** Organic matter amounts obtained from 10 stations in Lake Bafa throughout the year (%).

|                  | Station 1 | Station 2 | Station 3 | Station 4    | Station 5 | Station 6    | Station 7 | Station 8 | Station 9 | Station 10 |
|------------------|-----------|-----------|-----------|--------------|-----------|--------------|-----------|-----------|-----------|------------|
| <b>JANUARY</b>   | 29.58     | 42.31     | 40.23     | <b>11.11</b> | 35.14     | 17.02        | 14.10     | 44.44     | 58.43     | 31.25      |
| <b>FEBRUARY</b>  | 50.00     | 27.04     | 92.59     | 41.43        | 93.10     | <b>94.29</b> | 54.41     | 77.61     | 76.72     | 36.67      |
| <b>MARCH</b>     | 48.50     | 26.50     | 32.10     | 54.80        | 36.90     | 21.40        | 57.80     | 65.40     | 12.40     | 25.60      |
| <b>APRIL</b>     | 56.90     | 24.50     | 89.60     | 36.50        | 24.10     | 89.65        | 47.40     | 35.20     | 65.40     | 21.40      |
| <b>MAY</b>       | 48.30     | 29.18     | 54.33     | 43.16        | 54.37     | 49.45        | 51.50     | 58.01     | 50.85     | 29.54      |
| <b>JUNE</b>      | 83.00     | 88.00     | 82.00     | 84.00        | 86.00     | 79.00        | 77.00     | 89.00     | 84.00     | 89.00      |
| <b>JULY</b>      | 65.00     | 68.00     | 69.00     | 71.00        | 77.00     | 72.00        | 74.00     | 69.00     | 63.00     | 59.00      |
| <b>AUGUST</b>    | 62.00     | 71.00     | 73.00     | 75.00        | 74.00     | 71.00        | 69.00     | 65.00     | 64.00     | 62.00      |
| <b>SEPTEMBER</b> | 49.19     | 52.72     | 51.40     | 66.55        | 72.64     | 70.20        | 55.22     | 53.55     | 55.26     | 48.37      |
| <b>OCTOBER</b>   | 45.80     | 46.50     | 48.50     | 65.80        | 72.50     | 69.90        | 52.60     | 48.50     | 54.59     | 46.90      |
| <b>NOVEMBER</b>  | 62.55     | 70.10     | 60.18     | 68.47        | 74.27     | 73.41        | 71.67     | 71.84     | 61.33     | 55.56      |
| <b>DECEMBER</b>  | 62.00     | 63.00     | 65.00     | 68.00        | 62.00     | 69.00        | 71.00     | 65.00     | 63.00     | 62.00      |

**Supplementary table S35.** Inorganic matter amounts obtained from 10 stations in Lake Bafa throughout the year (%).

|                  | Station 1 | Station 2 | Station 3 | Station 4    | Station 5 | Station 6   | Station 7 | Station 8 | Station 9 | Station 10 |
|------------------|-----------|-----------|-----------|--------------|-----------|-------------|-----------|-----------|-----------|------------|
| <b>JANUARY</b>   | 70.42     | 57.69     | 59.77     | <b>88.89</b> | 64.86     | 82.98       | 85.90     | 55.56     | 41.57     | 68.75      |
| <b>FEBRUARY</b>  | 50.00     | 72.96     | 7.41      | 58.57        | 6.90      | <b>5.71</b> | 45.59     | 22.39     | 23.28     | 63.33      |
| <b>MARCH</b>     | 51.50     | 73.50     | 67.90     | 45.20        | 63.10     | 78.60       | 42.20     | 34.60     | 87.60     | 74.40      |
| <b>APRIL</b>     | 43.10     | 75.50     | 10.40     | 63.50        | 75.90     | 10.35       | 52.60     | 64.80     | 34.60     | 78.60      |
| <b>MAY</b>       | 51.70     | 70.82     | 45.67     | 56.84        | 45.63     | 50.55       | 48.50     | 41.99     | 49.15     | 70.46      |
| <b>JUNE</b>      | 17.00     | 12.00     | 18.00     | 16.00        | 14.00     | 21.00       | 23.00     | 11.00     | 16.00     | 11.00      |
| <b>JULY</b>      | 35.00     | 32.00     | 31.00     | 29.00        | 23.00     | 28.00       | 26.00     | 31.00     | 37.00     | 41.00      |
| <b>AUGUST</b>    | 38.00     | 29.00     | 27.00     | 25.00        | 26.00     | 29.00       | 31.00     | 35.00     | 36.00     | 38.00      |
| <b>SEPTEMBER</b> | 50.81     | 47.28     | 48.60     | 33.45        | 27.36     | 29.80       | 44.78     | 46.45     | 44.74     | 51.63      |
| <b>OCTOBER</b>   | 54.20     | 53.50     | 51.50     | 34.20        | 27.50     | 30.10       | 47.40     | 51.50     | 45.41     | 53.10      |
| <b>NOVEMBER</b>  | 37.45     | 29.90     | 39.82     | 31.53        | 25.73     | 26.59       | 28.33     | 28.16     | 38.67     | 44.44      |
| <b>DECEMBER</b>  | 38.00     | 37.00     | 35.00     | 32.00        | 38.00     | 31.00       | 29.00     | 35.00     | 37.00     | 38.00      |
